# Supplementary material for: Homologous Recombination Repair Mechanisms in Serous Endometrial Cancer
Source: MDPI journal article supplement (doi:10.3390/cancers13020254), 2021-01-12
Supplement: s1 [file s1]

## Supplementary Table S1

Detailed clinical data, sorted from the highest HRD score to the lowest. Tumors with HRD score  $\geq 42$  display an HRD phenotype.

| Id nr | HRD score | Stage | Age | p53* | MMR** | PTEN*** | Heredity                                                                            | Other information                      | Adjuvant treatment   | Relapse site |
|-------|-----------|-------|-----|------|-------|---------|-------------------------------------------------------------------------------------|----------------------------------------|----------------------|--------------|
| 222   | 66        | IIIC1 | 69  | 1    | N/A   | 1       |                                                                                     |                                        | P/C <sup>‡</sup> x 4 |              |
| 45    | 58        | IA    | 83  | 1    | 0     | 0       |                                                                                     | synchronous chronic lymphatic leukemia | No <sup>†</sup>      |              |
| 52    | 56        | IIIC1 | 81  | 1    | 0     | 1       |                                                                                     |                                        | P/C <sup>‡</sup> x 4 |              |
| 10    | 53        | IA    | 90  | 1    | 0     | 1       |                                                                                     |                                        | No <sup>†</sup>      |              |
| 160   | 51        | IVB   | 72  | 1    | 0     | 1       | father colon cancer<br>brother prostate cancer                                      |                                        | P/C <sup>‡</sup> x 6 | ascites      |
| 144   | 50        | IA    | 73  | 1    | 0     | 1       |                                                                                     |                                        | P/C <sup>‡</sup> x 4 |              |
| 86    | 49        | IB    | 79  | 1    | 0     | 1       |                                                                                     |                                        | P/C <sup>‡</sup> x 4 |              |
| 74    | 48        | IIIC1 | 80  | 1    | 0     | 1       | father head & neck cancer<br><br>brother head & neck cancer<br>sister breast cancer |                                        | P/C <sup>‡</sup> x1  |              |
| 169   | 44        | IB    | 72  | 1    | 0     | N/A     |                                                                                     |                                        | P/C <sup>‡</sup> x 4 |              |
| 208   | 42        | IA    | 71  | 1    | 0     | 0       | mother unspecified abdominal cancer                                                 |                                        | P/C <sup>‡</sup> x 4 |              |
| 8     | 33        | IA    | 90  | 1    | 1     | 1       |                                                                                     |                                        | No <sup>†</sup>      |              |
| 134   | 27        | IA    | 74  | 1    | 0     | 1       | aunt endometrial cancer                                                             |                                        | P/C <sup>‡</sup> x 4 |              |
| 50    | 26        | IB    | 81  | 1    | 0     | 1       |                                                                                     |                                        | C <sup>‡</sup> x 4   |              |
| 360   | 25        | IA    | 64  | 1    | 0     | 1       |                                                                                     |                                        | P/C <sup>‡</sup> x 4 |              |
| 193   | 23        | IVB   | 72  | 1    | 0     | 1       |                                                                                     |                                        | P/C <sup>‡</sup> x 6 |              |
| 263   | 23        | IA    | 68  | 1    | 0     | 1       |                                                                                     |                                        | P/C <sup>‡</sup> x 4 |              |

| Supplementary Table S1, continued |    |       |    |   |   |   |                              |  |                      |                             |
|-----------------------------------|----|-------|----|---|---|---|------------------------------|--|----------------------|-----------------------------|
| 185                               | 18 | IVB   | 71 | 1 | 0 | 1 |                              |  | P/C <sup>‡</sup> x 5 | ascites<br>pleural effusion |
| 41                                | 11 | IA    | 82 | 0 | 0 | 1 |                              |  | No <sup>†</sup>      |                             |
| 443                               | 10 | IIIC2 | 56 | 1 | 0 | 1 | mother unspecified<br>cancer |  | P/C <sup>‡</sup> x 4 | ascites                     |

\*p53 IHC is dichotomized as 0 = wild type, and 1 = p53 mutation

\*\*MMR IHC is a dichotomized sum where 1 = mutation

\*\*\*PTEN IHC is dichotomized as 0 = loss of function, and 1 = retained function

<sup>†</sup>The reason for not administering adjuvant treatment was co-morbidity

<sup>‡</sup>C = carboplatin AUC6 x number of treatment cycles

<sup>‡</sup>paclitaxel 175 mg/m<sup>2</sup> and carboplatin AUC5 x number of treatment cycles

N/A = data missing
