# Supplementary material for: Homologous Recombination Repair Mechanisms in Serous Endometrial Cancer
Source: MDPI journal article supplement (doi:10.3390/cancers13020254), 2021-01-12

**Supplementary Figure S3.** Heatmap of cases and genes with genetic loss, LOH, and homozygous deletions in NHEJ-associated genes

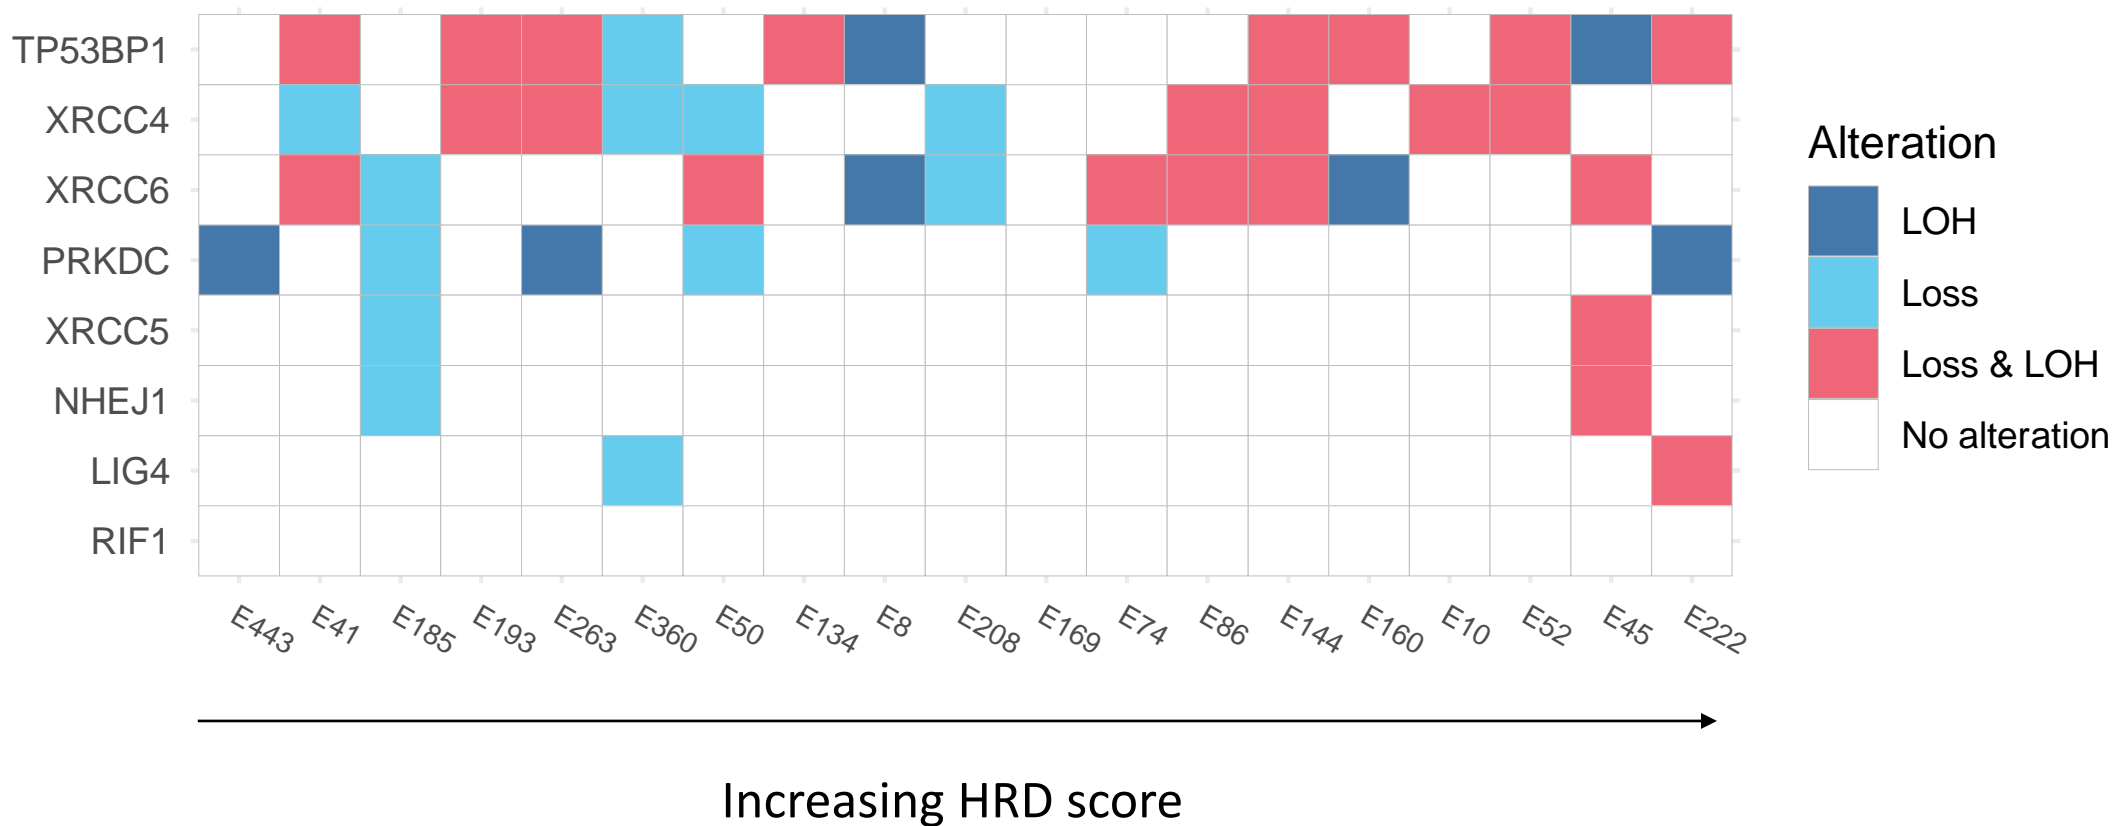

Supplement: s1 [file s1]
