# Supplementary material for: Homologous Recombination Repair Mechanisms in Serous Endometrial Cancer
Source: MDPI journal article supplement (doi:10.3390/cancers13020254), 2021-01-12
Supplement: s1 [file s1]

### Supplementary Table S3

Overview of antibodies used in the current study

All sections were stained using BenchMark Ultra (Roche®) and the respective antibody buffers.

For antibody detection either OptiView DAB or Ultra View Universal DAB (Roche®) was used.

| Antibody        | Vendor              | Type                 | Clone         | Dilution | Evaluation                                                                                                                                                                                                                                                                                             |
|-----------------|---------------------|----------------------|---------------|----------|--------------------------------------------------------------------------------------------------------------------------------------------------------------------------------------------------------------------------------------------------------------------------------------------------------|
| <b>p53</b>      | DAKO®               | Mouse<br>monoclonal  | DO-7          | 1:100    | 1 = aberrant negative or >80% cells with aberrant positive nuclear staining*<br>0 = wild type (between ab. pos. and neg.)                                                                                                                                                                              |
| <b>p16</b>      | Ventana®            | Mouse<br>monoclonal  | E6H4          | RTU      | 1 = block positive (moderate-strong nucl. and cytoplasm. staining in 10-20 close cells*<br>0 = no staining or mosaic pattern                                                                                                                                                                           |
| <b>ER</b>       | Ventana®            | Rabbit<br>monoclonal | SP1           | RTU      | 2 = $\geq 50\%$ cells with nuclear staining*<br>1 = 10-49% cells with nuclear staining*<br>0 = <10% cells with nuclear staining                                                                                                                                                                        |
| <b>PgR</b>      | Ventana®            | Rabbit<br>monoclonal | 100           | RTU      | 2 = $\geq 50\%$ cells with nuclear staining*<br>1 = 10-49% cells with nuclear staining*<br>0 = <10% cells with nuclear staining                                                                                                                                                                        |
| <b>Ki67</b>     | DAKO®               | Mouse<br>monoclonal  | MIB-1         | 1:50     | 3 = $\geq 75\%$ cells with nuclear staining in 200 nuclei in hot-spot areas<br>2 = 50-74% cells with nuclear staining in 200 nuclei in hot-spot areas<br>1 = 25-49 cells with nuclear staining in 200 nuclei in hot-spot areas<br>0 = <25% cells with nuclear staining in 200 nuclei in hot-spot areas |
| <b>WT1</b>      | DAKO®               | Mouse<br>monoclonal  | 6F-H2         | RTU      | 1 = $\geq 10\%$ cells with nuclear staining*<br>0 = <10% cells with nuclear staining                                                                                                                                                                                                                   |
| <b>Napsin A</b> | Leica®              | Mouse<br>monoclonal  | IP64          | 1:20     | 1 = diffuse, spotted cytoplasmic staining*<br>0 = other staining pattern than 1                                                                                                                                                                                                                        |
| <b>MLH1</b>     | Leica®              | Mouse<br>monoclonal  | ES05          | 1:100    | 1 = loss of staining**<br>0 = retained staining                                                                                                                                                                                                                                                        |
| <b>MSH2</b>     | AH-<br>Diagnostics® | Mouse<br>monoclonal  | G219-<br>1129 | 1:100    | 1 = loss of staining**<br>0 = retained staining                                                                                                                                                                                                                                                        |
| <b>MSH6</b>     | Biosite®            | Rabbit<br>monoclonal | EP49          | 1:100    | 1 = loss of staining**<br>0 = retained staining                                                                                                                                                                                                                                                        |

| Supplementary Table S4 continued |          |                      |       |          |                                                                                                                                       |
|----------------------------------|----------|----------------------|-------|----------|---------------------------------------------------------------------------------------------------------------------------------------|
| Antibody                         | Vendor   | Type                 | Clone | Dilution | Evaluation                                                                                                                            |
| <b>PMS2</b>                      | Biosite® | Rabbit<br>monoclonal | EP51  | 1:100    | 1 = loss of staining**<br>0 = retained staining                                                                                       |
| <b>PTEN</b>                      | Ventana® | Rabbit<br>monoclonal | SP218 | RTU      | 1 = diffuse cytoplasmic staining in >90% cells<br>0 = diffuse cytoplasmic staining in <1% cells***<br>heterogeneous = between 0 and 1 |

RTU = ready to use; 1-3=positive scoring, 0=negative scoring

\*indicates mutation or overexpression; \*\*MMR mutation; \*\*\*mutation/loss of function
