# Supplementary material for: Homologous Recombination Repair Mechanisms in Serous Endometrial Cancer
Source: MDPI journal article supplement (doi:10.3390/cancers13020254), 2021-01-12
Supplement: s1 [file s1]

## Supplementary Table S2

Variants detected through targeted sequencing. All potentially pathogenic variants presented.

| CHROM | POS       | SAMPLE | REF | ALT | GENE  | TOP_EFFECT              | MEAN_AD  | MEAN_AB | CLINVAR_classification | HGVS               |
|-------|-----------|--------|-----|-----|-------|-------------------------|----------|---------|------------------------|--------------------|
| 10    | 89624296  | E169   | G   | C   | PTEN  | nonsynonymous_SNV       | 153/581  | 0,792   | pathogenic             | c.70G>C            |
| 10    | 89692905  | E8     | G   | A   | PTEN  | nonsynonymous_SNV       | 924/127  | 0,121   | pathogenic             | c.390G>A           |
| 10    | 89711900  | E8     | G   | A   | PTEN  | nonsynonymous_SNV       | 955/109  | 0,102   | pathogenic             | c.518G>A           |
| 10    | 89720647  | E193   | -   | G   | PTEN  | near_splice             | 102/68   | 0,4     | unknown                | c.802-4_804delinsA |
| 12    | 133215703 | E160   | G   | C   | POLE  | near_splice             | 434/74   | 0,146   | unknown                | c.5552+8C>G        |
| 16    | 23646295  | E134   | T   | C   | PALB2 | synonymous_SNV          | 570/775  | 0,576   | unknown                | c.1572A>G          |
| 17    | 7577094   | E74    | G   | A   | TP53  | nonsynonymous_SNV       | 153/227  | 0,597   | pathogenic             | c.844C>T           |
| 17    | 7577097   | E193   | C   | T   | TP53  | nonsynonymous_SNV       | 157/456  | 0,744   | pathogenic             | c.841G>A           |
| 17    | 7577120   | E144   | C   | A   | TP53  | nonsynonymous_SNV       | 40/424   | 0,914   | pathogenic             | c.818G>T           |
| 17    | 7577120   | E52    | C   | T   | TP53  | nonsynonymous_SNV       | 174/333  | 0,657   | pathogenic             | c.818G>T           |
| 17    | 7577538   | E45    | C   | T   | TP53  | nonsynonymous_SNV       | 389/120  | 0,236   | pathogenic             | c.743G>A           |
| 17    | 7577538   | E41    | C   | T   | TP53  | nonsynonymous_SNV       | 152/778  | 0,837   | pathogenic             | c.743G>A           |
| 17    | 7577539   | E8     | G   | A   | TP53  | nonsynonymous_SNV       | 717/123  | 0,146   | pathogenic             | c.742C>T           |
| 17    | 7577541   | E169   | -   | *   | TP53  | nonframeshift_insertion | 27/181   | 0,87    | unknown                | NA                 |
| 17    | 7578177   | E134   | C   | T   | TP53  | synonymous_SNV          | 1253/166 | 0,117   | unknown                | c.672G>A           |
| 17    | 7578203   | E86    | C   | T   | TP53  | nonsynonymous_SNV       | 163/506  | 0,756   | pathogenic             | c.646G>A           |
| 17    | 7578271   | E10    | T   | C   | TP53  | nonsynonymous_SNV       | 91/393   | 0,812   | pathogenic             | c.578A>G           |
| 17    | 7578406   | E263   | C   | T   | TP53  | nonsynonymous_SNV       | 101/346  | 0,774   | pathogenic             | c.524G>A           |
| 17    | 7578556   | E50    | T   | C   | TP53  | splicing                | 520/249  | 0,324   | pathogenic             | c.376-2A>G         |
| 17    | 7579377   | E50    | G   | -   | TP53  | frameshift_deletion     | 448/163  | 0,267   | pathogenic             | c.310del           |

\*TCATGCCGCCCATGCAGGAAGTGTACACA
