# Supplementary material for: Homologous Recombination Repair Mechanisms in Serous Endometrial Cancer
Source: MDPI journal article supplement (doi:10.3390/cancers13020254), 2021-01-12

**Supplementary Figure S2.** Kaplan-Meier estimate of overall survival (OS) for HR deficient vs. proficient cases. Each descending step in the plot marks a deceased patient and vertical tick-marks represent patients still alive at last follow-up.

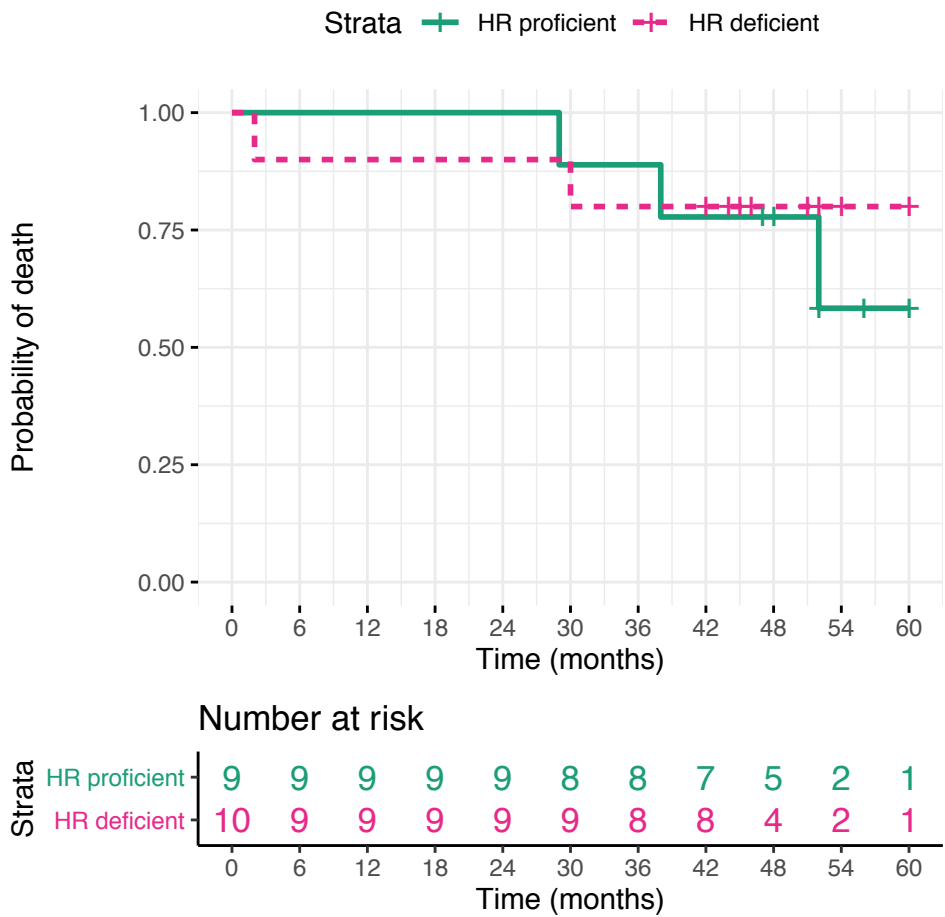

Supplement: s1 [file s1]
