# Supplementary material for: Homologous Recombination Repair Mechanisms in Serous Endometrial Cancer
Source: MDPI journal article supplement (doi:10.3390/cancers13020254), 2021-01-12

**Supplementary Figure S4.** Significant amplification (A) and deletion (B) peaks from the GISTIC analysis.

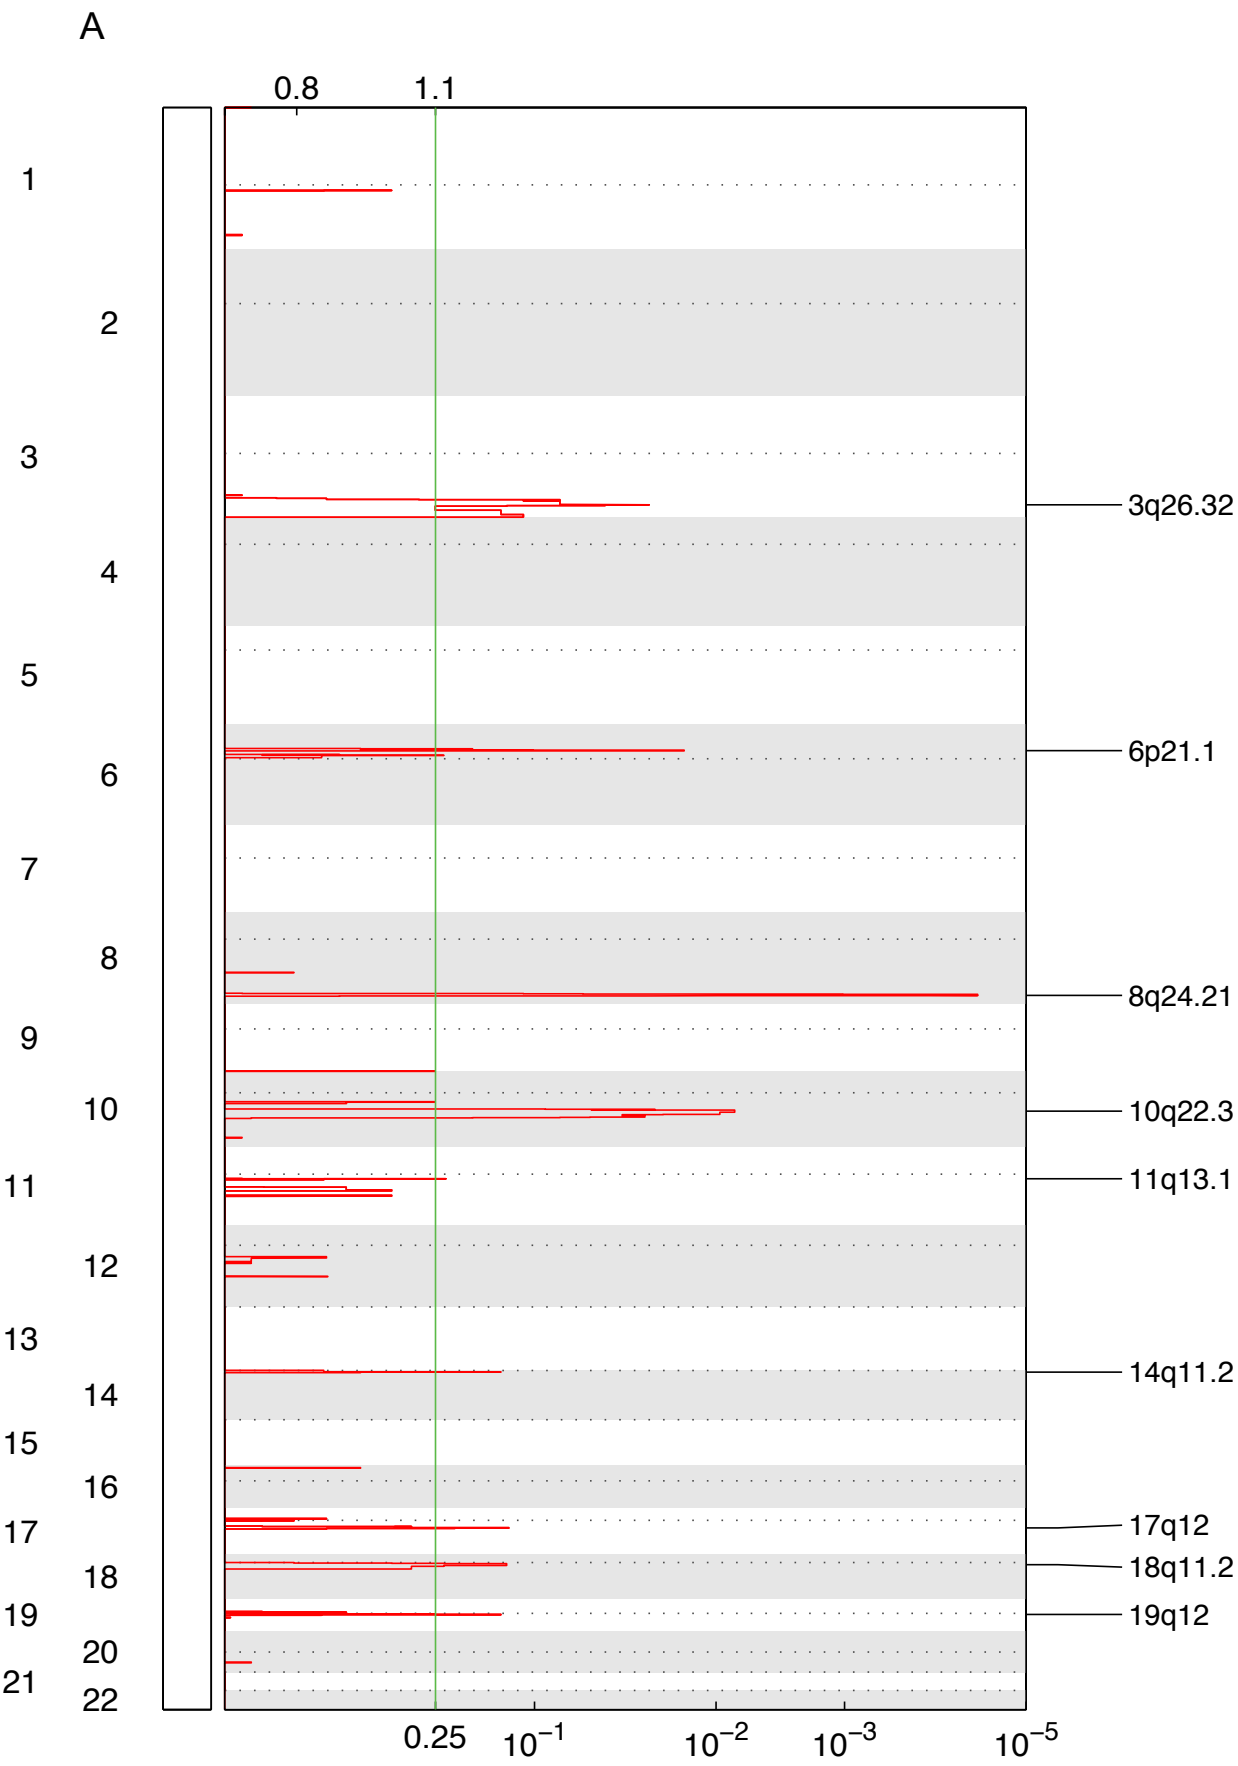

B

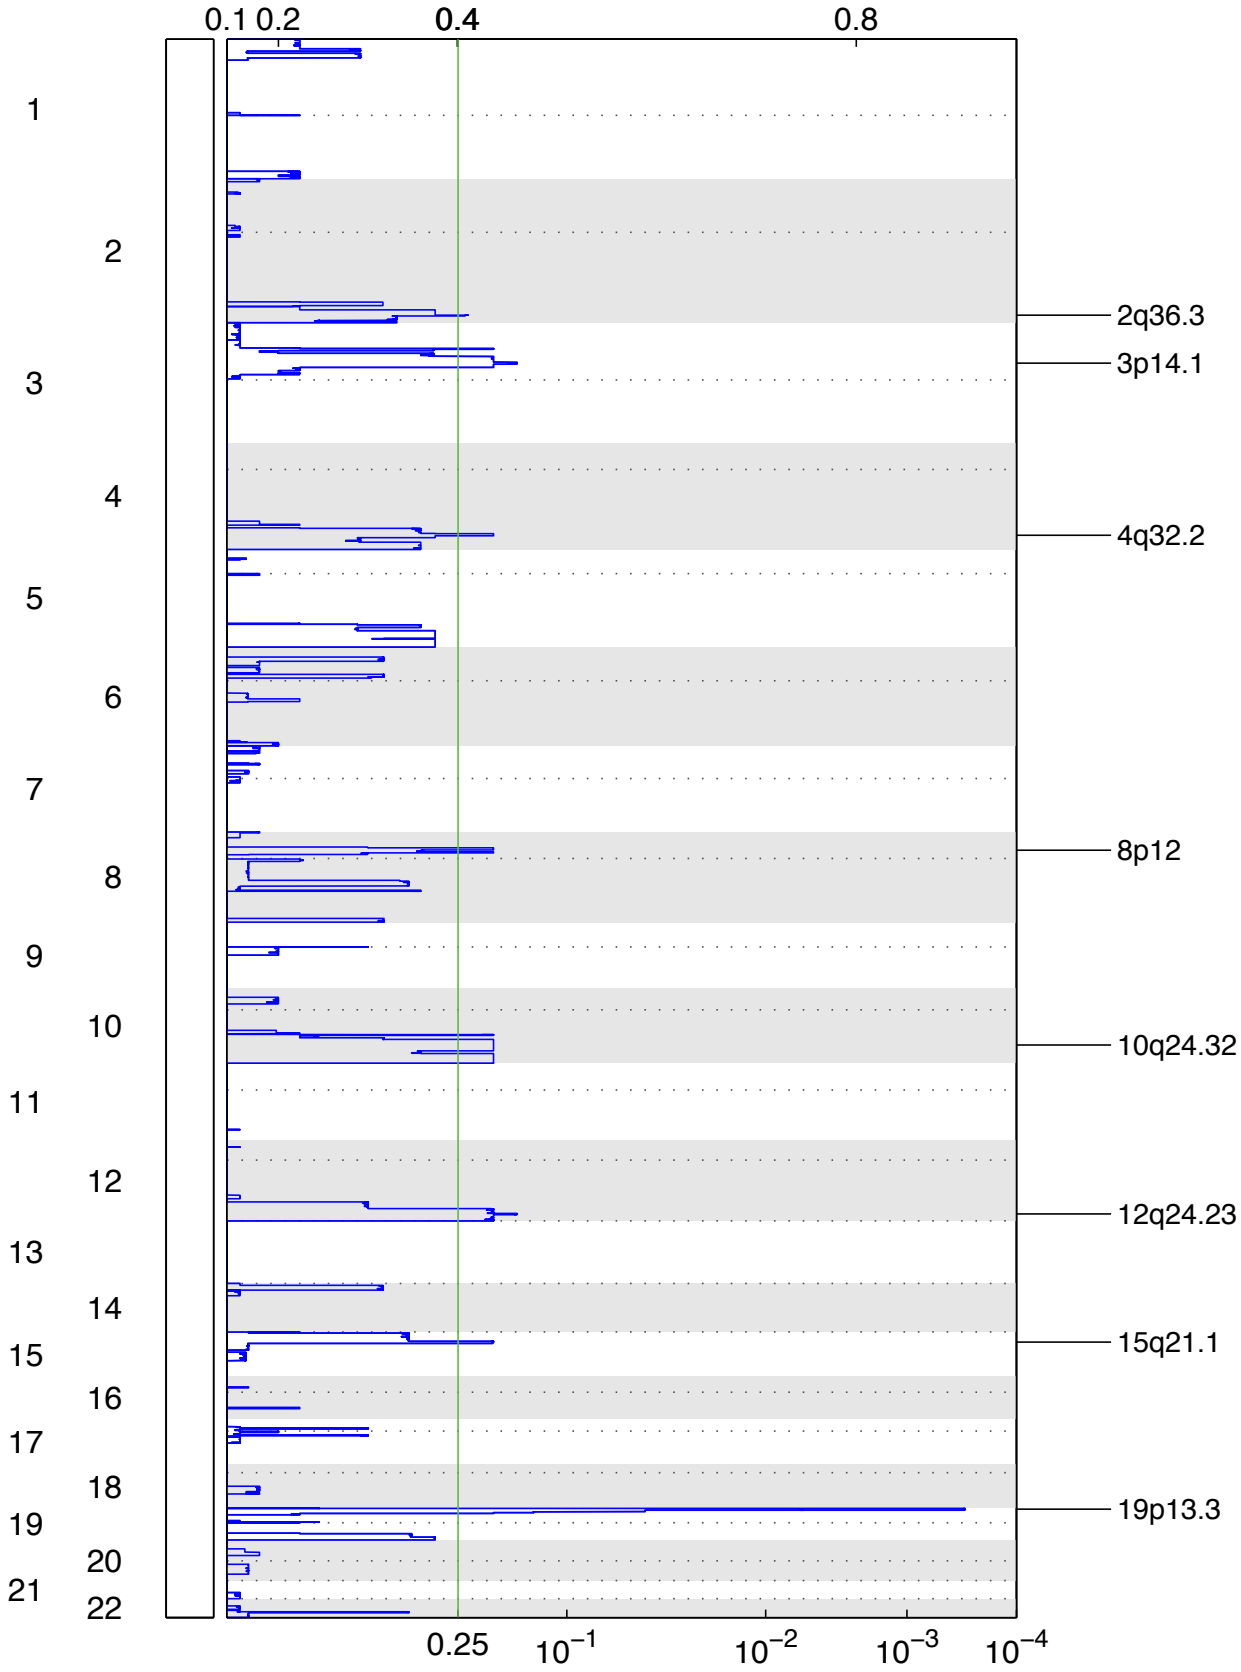

Supplement: s1 [file s1]
