# Supplementary material for: Homologous Recombination Repair Mechanisms in Serous Endometrial Cancer
Source: MDPI journal article supplement (doi:10.3390/cancers13020254), 2021-01-12
Supplement: s1 [file s1]

Supplementary Table S4 Genes included in significant GISTIC deletion peaks

| cytoband             | 19p13.3         | 3p14.1                 | 12q24.23                  | 4q32.2                   |
|----------------------|-----------------|------------------------|---------------------------|--------------------------|
| q value              | 0,00031532      | 0,15763                | 0,15898                   | 0,18973                  |
| residual q value     | 0,00031532      | 0,15763                | 0,15763                   | 0,18973                  |
| wide peak boundaries | chr19:1-2451267 | chr3:52861770-70011694 | chr12:100419710-133275309 | chr4:149270911-190214555 |
| genes in wide peak   | AMH             | ARF4                   | ACACB                     | hsa-mir-1979             |
|                      | ATP5D           | ERC2-IT1               | ACADS                     | AGA                      |
|                      | AZU1            | CACNA1D                | ALDH2                     | SLC25A4                  |
|                      | HCN2            | DNASE1L3               | ARL1                      | ANXA2P1                  |
|                      | BSG             | FHIT                   | ASCL1                     | CASP3                    |
|                      | CDC34           | FLNB                   | ATP2A2                    | LRBA                     |
|                      | CIRBP           | MITF                   | BCL7A                     | CLCN3                    |
|                      | CNN2            | PDHB                   | SCARB1                    | CPE                      |
|                      | CSNK1G2         | PRKCD                  | CMKLR1                    | CTSO                     |
|                      | CFD             | PTPRG                  | COX6A1                    | DCTD                     |
|                      | ARID3A          | ATXN7                  | CRY1                      | ETFDH                    |
|                      | EFNA2           | TKT                    | DAO                       | F11                      |
|                      | ELANE           | TMF1                   | DTX1                      | ACSL1                    |
|                      | GAMT            | WNT5A                  | EIF2B1                    | FAT1                     |
|                      | MKNK2           | SLMAP                  | STX2                      | FGA                      |
|                      | GPX4            | ACOX2                  | GOLGA3                    | FGB                      |
|                      | GZMM            | CADPS                  | GTF2H3                    | FGG                      |
|                      | OAZ1            | SUCLG2                 | HPD                       | FRG1                     |
|                      | PALM            | HESX1                  | IGF1                      | GK3P                     |
|                      | POLR2E          | UBA3                   | MMP17                     | GLRB                     |
|                      | POLRMT          | MAGI1                  | MSI1                      | GPM6A                    |
|                      | PRTN3           | PSMD6                  | MVK                       | GRIA2                    |
|                      | PTBP1           | ARL6IP5                | MYBPC1                    | GUCY1A3                  |
|                      | RPS15           | RPP14                  | MYL2                      | GUCY1B3                  |
|                      | STK11           | FAM107A                | NFYB                      | HMGB2                    |
|                      | TCF3            | FRMD4B                 | NOS1                      | HPGD                     |
|                      | MADCAM1         | FAM208A                | OAS1                      | ING2                     |

cytoband  
genes in wide peak

| 19p13.3  | 3p14.1   | 12q24.23 | 4q32.2   |
|----------|----------|----------|----------|
| SF3A2    | LRIG1    | OAS2     | IRF2     |
| PLPP2    | ERC2     | OAS3     | KLKB1    |
| AP3D1    | APPL1    | P2RX4    | MTNR1A   |
| MED16    | ARHGEF3  | P2RX7    | NEK1     |
| FSTL3    | SFMBT1   | PEBP1    | NPY1R    |
| APC2     | IL17RD   | PAH      | NPY2R    |
| ABCA7    | PXK      | PLA2G1B  | NPY5R    |
| UQCR11   | FEZF2    | PMCH     | GATB     |
| SBNO2    | CHDH     | POLE     | PLRG1    |
| ARHGAP45 | IL17RB   | PPP1CC   | PPID     |
| SHC2     | CACNA2D3 | PRKAB1   | RPS3A    |
| TIMM13   | DCP1A    | PSMD9    | MSMO1    |
| DAZAP1   | LMOD3    | PTPN11   | SFRP2    |
| RNU6-1   | ADAMTS9  | PXMP2    | TDO2     |
| FGF22    | ABHD6    | PXN      | TLL1     |
| THEG     | LRTM1    | RAN      | TLR2     |
| LSM7     | C3orf14  | RFC5     | TLR3     |
| MBD3     | SELK     | RFX4     | VEGFC    |
| MIER2    | THOC7    | RPL6     | GLRA3    |
| PCSK4    | KBTBD8   | RPLP0    | SORBS2   |
| C19orf24 | RFT1     | CLIP1    | SAP30    |
| PLEKHJ1  | ACTR8    | ATXN2    | SNORD73A |
| BTBD2    | SLC25A26 | SELPLG   | LRAT     |
| RNF126   | FAM3D    | SFSWAP   | HAND2    |
| SPPL2B   | C3orf49  | TBX5     | RAPGEF2  |
| WDR18    | SNTN     | TBX3     | MFAP3L   |
| REXO1    | SYNPR    | HNF1A    | MAB21L2  |
| PLPPR3   | ASB14    | TDG      | ADAM29   |
| OR4F17   | FAM19A4  | HSP90B1  | ANXA10   |
| ABHD17A  | PRICKLE2 | TXNRD1   | KLHL2    |
| KLF16    | C3orf67  | UBC      | SCRG1    |
| DOT1L    | KCTD6    | UNG      | PALLD    |

| cytoband           | 19p13.3     | 3p14.1       | 12q24.23 | 4q32.2        |
|--------------------|-------------|--------------|----------|---------------|
| genes in wide peak | KISS1R      | DNAH12       | ZNF10    | KIAA0922      |
|                    | MUM1        | PDE12        | ZNF26    | TRIM2         |
|                    | MIDN        | DENND6A      | ZNF84    | ANP32C        |
|                    | R3HDM4      | EOGT         | ZNF140   | FAM149A       |
|                    | TMEM259     | CCDC66       | CDK2AP1  | FBXO8         |
|                    | TPGS1       | LINC00698    | BRAP     | ARFIP1        |
|                    | REEP6       | SPATA12      | ULK1     | PDLIM3        |
|                    | IZUMO4      | FAM19A1      | RASAL1   | SPOCK3        |
|                    | SCAMP4      | ESRG         | MAPKAPK5 | AADAT         |
|                    | ADAT3       | LINC00994    | DENR     | FAM198B       |
|                    | GRIN3B      | MIR3136      | OASL     | ASIC5         |
|                    | JSRP1       | MIR4272      | DYNLL1   | GALNT7        |
|                    | MOB3A       | MIR3938      | SRSF9    | CLDN22        |
|                    | MISP        | PTPRG-AS1    | HRK      | DKFZP434I0714 |
|                    | PLK5        | PSMD6-AS2    | ADAM1A   | DCHS2         |
|                    | C2CD4C      | ADAMTS9-AS2  | HCAR3    | HPF1          |
|                    | CIRBP-AS1   | PRICKLE2-AS1 | HIP1R    |               |
|                    | C19orf25    | MAGI1-AS1    | PIWIL1   | NEIL3         |
|                    | ATP8B3      | SYNPR-AS1    | CABP1    | FBXW7         |
|                    | CBARP       | THOC7-AS1    | NCOR2    | TMEM144       |
|                    | CSNK1G2-AS1 | ARHGEF3-AS1  | WSCD2    | TMA16         |
|                    | ODF3L2      | CACNA2D3-AS1 | SART3    | UFSP2         |
|                    | ADAMTSL5    | PRICKLE2-AS2 | KNTC1    | DDX60         |
|                    | TMPRSS9     | PRICKLE2-AS3 | MLEC     | CDKN2AIP      |
|                    | NDUFS7      | SUCLG2-AS1   | GIT2     | TENM3         |
|                    | C19orf35    | LOC101929159 | NUAK1    | LRP2BP        |
|                    | WASH5P      | C3orf67-AS1  | RBM19    | PDGFC         |
|                    | ONECUT3     | ADAMTS9-AS1  | RNF10    | FSTL5         |
|                    | MEX3D       | MIR548BB     | NR1H4    | STOX2         |
|                    | LINC01002   | LOC105377102 | SH2B3    | CFAP97        |
|                    | PRSS57      | LOC105377105 | ARPC3    | FNIP2         |
|                    | LINGO3      | FAM3D-AS1    | MPHOSPH9 | SH3RF1        |

01-mar

cytoband  
genes in wide peak

| 19p13.3      | 3p14.1       | 12q24.23 | 4q32.2    |
|--------------|--------------|----------|-----------|
| FAM138A      | LOC105377143 | CAMKK2   | RXFP1     |
| FAM138C      | LOC105377146 | ZNF268   | SPCS3     |
| LOC100288123 | ARF4-AS1     | TRAFD1   | TRAPPC11  |
| MIR1909      |              | TMED2    | CENPU     |
| MIR1302-2    |              | ERP29    | HAND2-AS1 |
| MIR1227      |              | CKAP4    | MAP9      |
| MIR1302-9    |              | GCN1     | WWC2      |
| MIR1302-10   |              | SDS      | CEP44     |
| MIR3187      |              | RAB35    | SNX25     |
| MIR1302-11   |              | SNRNP35  | MND1      |
| MIR4321      |              | PRDM4    | TKTL2     |
| MIR4745      |              | CIT      | CBR4      |
| RNU6-7       |              | PWP1     | FHDC1     |
| MIR6789      |              | FICD     | LOC90768  |
| MIR7108      |              | FZD10    | DDX60L    |
| RNU6-2       |              | MLXIP    | NAF1      |
|              |              | RPH3A    | WDR17     |
|              |              | P2RX2    | ZFP42     |
|              |              | FBXO21   | SPATA4    |
|              |              | SETD1B   | ENPP6     |
|              |              | ANKLE2   | ASB5      |
|              |              | CUX2     | SH3D19    |
|              |              | KIAA1033 | WWC2-AS2  |
|              |              | MED13L   | FAM218A   |
|              |              | SIRT4    | C4orf45   |
|              |              | ABCB9    | DCLK2     |
|              |              | ISCU     | TRIM60    |
|              |              | RIMBP2   | RBM46     |
|              |              | ATP6V0A2 | C4orf46   |
|              |              | CORO1C   | TIGD4     |
|              |              | FBXW8    | TMEM154   |
|              |              | HSPB8    | TMEM192   |

cytoband  
genes in wide peak

| 19p13.3 | 3p14.1 | 12q24.23     | 4q32.2    |
|---------|--------|--------------|-----------|
|         |        | RNU4-2       | RWDD4     |
|         |        | RNU4-1       | PRIMPOL   |
|         |        | HCAR1        | TRIML2    |
|         |        | UTP20        | CCDC110   |
|         |        | IFT81        | CYP4V2    |
|         |        | FAM216A      | F11-AS1   |
|         |        | HCFC2        | LINC01098 |
|         |        | SYCP3        | RNF175    |
|         |        | CHST11       | LOC339975 |
|         |        | GALNT9       | TRIML1    |
|         |        | CCDC53       | LOC340017 |
|         |        | GPN3         | PRSS48    |
|         |        | GLTP         | ANKRD37   |
|         |        | MAPKAPK5-AS1 | LOC389247 |
|         |        | ARL6IP4      | TRIM61    |
|         |        | TAOK3        | HELT      |
|         |        | POP5         | LINC01060 |
|         |        | ANAPC5       | FAM92A1P2 |
|         |        | ANAPC7       | LOC441052 |
|         |        | TRIAP1       | C4orf47   |
|         |        | NT5DC3       | GALNTL6   |
|         |        | VPS29        | FRG2      |
|         |        | TPCN1        | SLED1     |
|         |        | SSH1         | FLJ38576  |
|         |        | RHOF         | MIR578    |
|         |        | VSIG10       | LINC00290 |
|         |        | TESC         | LOC728175 |
|         |        | PARPBP       | FAM160A1  |
|         |        | RIC8B        | LOC729870 |
|         |        | APPL2        | MIR3945HG |
|         |        | SBNO1        | CLDN24    |
|         |        | DRAM1        | DUX4      |

cytoband  
genes in wide peak

| 19p13.3 | 3p14.1 | 12q24.23 | 4q32.2       |
|---------|--------|----------|--------------|
|         |        | SVOP     | MIR1305      |
|         |        | STAB2    | LOC100419170 |
|         |        | ZCCHC8   | DBET         |
|         |        | POLR3B   | MIR548T      |
|         |        | CHFR     | MIR3140      |
|         |        | WSB2     | MIR4276      |
|         |        | DIABLO   | MIR3945      |
|         |        | CHPT1    | MIR3688-1    |
|         |        | PITPNM2  | LINC01207    |
|         |        | EP400    | APELA        |
|         |        | DHX37    | LOC100506085 |
|         |        | FBRSL1   | LOC100506107 |
|         |        | DDX55    | LOC100506122 |
|         |        | TRPV4    | LINC01093    |
|         |        | LHX5     | LOC100506272 |
|         |        | SUDS3    | MIR4455      |
|         |        | C12orf43 | MIR4453      |
|         |        | VPS33A   | MIR4454      |
|         |        | RSRC2    | MIR3688-2    |
|         |        | AACS     | LOC100996286 |
|         |        | NUP37    | LOC101928052 |
|         |        | DDX54    | LOC101928131 |
|         |        | NOC4L    | LINC01179    |
|         |        | GNPTAB   | LINC01612    |
|         |        | B3GNT4   | LOC101928314 |
|         |        | TCTN1    | LOC101928509 |
|         |        | OGFOD2   | LOC101928551 |
|         |        | VPS37B   | LOC101928590 |
|         |        | C12orf49 | LINC01099    |
|         |        | TCTN2    | WWC2-AS1     |
|         |        | NAA25    | LINC01262    |
|         |        | SLC8B1   | LOC101930370 |

cytoband  
genes in wide peak

19p13.3

3p14.1

12q24.23

4q32.2

RNF34

DEAR

CCDC92

MIR6082

MTERF2

LOC102723766

PUS1

LOC102724776

ACAD10

LVCAT8

GLT8D2

LOC105377590

KCTD10

LINC01596

SLC41A2

TCHP

COQ5

HVCN1

SRRM4

CCDC62

KDM2B

UNC119B

USP30

ORAI1

RNFT2

FAM222A

RITA1

FAM222A-AS1

ANKRD13A

TMEM116

UBE3B

TMEM263

C12orf65

TMEM132C

BICDL1

SDSL

TMEM132B

IQCD

LINC01257

cytoband  
genes in wide peak

19p13.3

3p14.1

12q24.23

4q32.2

---

C12orf45  
TMEM132D  
SLC15A4  
ASCL4  
BTBD11  
SPIC  
ANO4  
ALKBH2  
FOXN4  
SPPL3  
BRI3BP  
RFLNA  
ZNF664  
TMEM120B  
WDR66  
GLT1D1  
RAD9B  
FAM109A  
LINC00934  
ALDH1L2  
SLC5A8  
PPTC7  
CCDC63  
CCDC60  
PGAM5  
RILPL2  
DNAH10  
PLBD2  
TTC41P  
LRRC43  
TCP11L2  
TBX5-AS1



cytoband  
genes in wide peak

19p13.3

3p14.1

12q24.23

4q32.2

---

LOC283352  
ADGRD1  
MORN3  
GAS2L3  
LINC00485  
MYO1H  
HECTD4  
KSR2  
GATC  
HNF1A-AS1  
DDX51  
MMAB  
HCAR2  
TMEM119  
LOC338797  
LINC01089  
EP400NL  
RILPL1  
C12orf42  
IL31  
C12orf75  
CFAP73  
TMEM233  
KMT5A  
LINC00944  
C12orf76  
LINC00939  
FLJ37505  
LOC414300  
LOC440117  
FZD10-AS1  
EID3

cytoband  
genes in wide peak

19p13.3

3p14.1

12q24.23

4q32.2

---

MAP1LC3B2  
ANHX  
SNORA49  
MIR619  
MIR620  
C12orf73  
LOC728739  
LOC100128554  
LOC100130238  
LINC01405  
USP30-AS1  
LOC100190940  
LINC00173  
LOC100287944  
ZNF605  
MIR1302-1  
MIR1178  
MIR4304  
MIR3612  
MIR3652  
MIR3922  
MIR3657  
MIR3908  
LOC100505978  
LINC01234  
LOC100506551  
PXN-AS1  
NRAV  
LOC100506691  
LRCOL1  
CLIP1-AS1  
LOC100507091

cytoband  
genes in wide peak

19p13.3

3p14.1

12q24.23

4q32.2

---

LINC00943  
ZNF664-FAM101A  
MIR4498  
MIR4496  
MIR4419B  
MIR4472-2  
MIR4700  
MIR4497  
MIR5188  
MIR548AQ  
LINC00507  
LOC100996671  
LOC100996679  
ZNF891  
LOC101593348  
LOC101927415  
LOC101927464  
LOC101927592  
LOC101927616  
LOC101927637  
LOC101927694  
LOC101927735  
LINC01486  
TESC-AS1  
LOC101928416  
LOC101928530  
LOC101928597  
LOC101929058  
LOC101929084  
CASC18  
LOC101929162  
MIR6760

cytoband  
genes in wide peak

| 19p13.3 | 3p14.1 | 12q24.23     | 4q32.2 |
|---------|--------|--------------|--------|
|         |        | MIR6761      |        |
|         |        | MIR6762      |        |
|         |        | MIR6861      |        |
|         |        | MIR7107      |        |
|         |        | MIR7641-2    |        |
|         |        | MIR6763      |        |
|         |        | MIR6880      |        |
|         |        | MIR7106      |        |
|         |        | MIR8072      |        |
|         |        | THRIL        |        |
|         |        | LINC01498    |        |
|         |        | LHX5-AS1     |        |
|         |        | LINC00508    |        |
|         |        | LOC105369945 |        |
|         |        | KCCAT198     |        |
|         |        | LOC105369980 |        |
|         |        | LOC105370014 |        |
|         |        | LOC105370016 |        |
|         |        | LOC105370024 |        |
|         |        | LOC105370068 |        |
|         |        | CRAT8        |        |
|         |        | XLOC_009911  |        |
|         |        | LACAT8       |        |
|         |        | LOC107161159 |        |

Genes included in significant GISTIC deletion peaks

| cytoband             | 8p12                   | 10q24.32                 | 15q21.1          | 2q36.3                   |
|----------------------|------------------------|--------------------------|------------------|--------------------------|
| q value              | 0,18973                | 0,18973                  | 0,18973          | 0,23137                  |
| residual q value     | 0,18973                | 0,18973                  | 0,18973          | 0,23137                  |
| wide peak boundaries | chr8:25507445-37407456 | chr10:80645499-13379742  | chr15:1-57608540 | chr2:207265195-242193529 |
| genes in wide peak   | ADRA1A<br>BNIP3L       | hsa-mir-3158-1<br>ACADSB | ACTC1<br>APBA2   | hsa-mir-1244-1<br>AAMP   |

cytoband  
genes in wide peak

| 8p12     | 10q24.32 | 15q21.1 | 2q36.3  |
|----------|----------|---------|---------|
| CHRNA2   | ACTA2    | B2M     | ACADL   |
| CLU      | ADAM8    | NBEAP1  | AGXT    |
| DPYSL2   | ADD3     | BUB1B   | ALPI    |
| DUSP4    | ADRA2A   | CAPN3   | ALPP    |
| EPHX2    | ADRB1    | CHRM5   | ALPPL2  |
| EXTL3    | FAS      | CHRNA7  | ATIC    |
| PTK2B    | ARL3     | CKMT1B  | KIF1A   |
| GSR      | BMPR1A   | CYP19A1 | BARD1   |
| GTF2E2   | BNIP3    | DUT     | BCS1L   |
| NRG1     | CASP7    | EPB42   | BOK     |
| PNOC     | ENTPD1   | FBN1    | CHRNA7  |
| PPP2CB   | CHUK     | FGF7    | CHRNA7  |
| PPP2R2A  | ABCC2    | GABPB1  | COL4A3  |
| WRN      | COL17A1  | GABRA5  | COL4A4  |
| FZD3     | COX15    | GABRB3  | COL6A3  |
| UBXN8    | CPN1     | GABRG3  | CPS1    |
| DCTN6    | CTBP2    | GALK2   | CREB1   |
| PNMA2    | CYP2C19  | GANC    | CRYBA2  |
| RBPM5    | CYP2C8   | GATM    | CRYGA   |
| TRIM35   | CYP2C9   | GCHFR   | CRYGB   |
| KIF13B   | CYP2C18  | PDIA3   | CRYGC   |
| LEPROTL1 | CYP2E1   | HDC     | CRYGD   |
| PURG     | CYP17A1  | ONECUT1 | CYP27A1 |
| SCARA3   | CYP26A1  | IPW     | DES     |
| SARAF    | DMBT1    | ITPKA   | DTYMK   |
| ELP3     | DNTT     | IVD     | EPHA4   |
| CCDC25   | DOCK1    | LTK     | ERBB4   |
| INTS9    | DUSP5    | MAP1A   | ACSL3   |
| PBK      | ECHS1    | MEIS2   | FN1     |
| ZNF395   | EMX2     | MFAP1   | GBX2    |
| TEX15    | FGF8     | TRPM1   | GPC1    |
| EBF2     | FGFR2    | MYO5A   | GPR35   |

| cytoband           | 8p12         | 10q24.32 | 15q21.1       | 2q36.3   |
|--------------------|--------------|----------|---------------|----------|
| genes in wide peak | DUSP26       | GFRA1    | NDN           | HDLBP    |
|                    | HMBOX1       | GLUD1    | NEDD4         | AGFG1    |
|                    | RNF122       | GOT1     | OCA2          | DNAJB2   |
|                    | TTI2         | PRLHR    | PLCB2         | HTR2B    |
|                    | STMN4        | GPR26    | MAPK6         | IDH1     |
|                    | MAK16        | GRK5     | RAB27A        | SP110    |
|                    | FUT10        | GRID1    | RAD51         | IGFBP2   |
|                    | UNC5D        | HABP2    | RYR3          | IGFBP5   |
|                    | ESCO2        | HELLS    | SCG5          | IHH      |
|                    | FBXO16       | HHEX     | SLC12A1       | CXCR1    |
|                    | KCNU1        | HMX2     | SNRPN         | CXCR2    |
|                    | SCARA5       | TLX1     | SORD          | CXCR2P1  |
|                    | FAM183CP     | HPS1     | SPINT1        | INHA     |
|                    | NUGGC        | HTR7     | SRP14         | INPP5D   |
|                    | LINC00589    | IDE      | TCF12         | IRS1     |
|                    | MBOAT4       | IFIT2    | THBS1         | KCNJ13   |
|                    | SNORD13      | IFIT1    | TJP1          | MAP2     |
|                    | RBPM5-AS1    | IFIT3    | TP53BP1       | MYL1     |
|                    | MIR548H4     | INPP5A   | TYRO3         | NCL      |
|                    | MIR4287      | KIF11    | UBE3A         | NDUFA10  |
|                    | MIR3148      | ABLIM1   | MKRN3         |          |
|                    | MIR4288      | LIPA     | SLC30A4       | NEU2     |
|                    | MIR3622A     | MGMT     | PWAR5         | NPPC     |
|                    | MIR3622B     | MKI67    | EIF3J         | PAX3     |
|                    | SMIM18       | MXI1     | JMJD7-PLA2G4B | PDCD1    |
|                    | NRG1-IT1     | NDUFB8   | SNAP23        | PDE6D    |
|                    | NRG1-IT3     | NFKB2    | HERC2         | SERPINE2 |
|                    | EXTL3-AS1    | NRAP     | SNURF         | PPP1R7   |
|                    | LOC101929450 | OAT      | USP8          | PSMD1    |
|                    | LOC101929470 | PAX2     | SLC28A2       | PTH2R    |
|                    | LOC101929550 | PDE6C    | CCPG1         | PTMA     |
|                    | MIR6842      | PGAM1    | COPS2         | PTPRN    |

02-sep

cytoband  
genes in wide peak

| 8p12      | 10q24.32 | 15q21.1   | 2q36.3  |
|-----------|----------|-----------|---------|
| MIR6843   | PITX3    | TGM5      | SNORD20 |
| MIR7641-2 | PNLIP    | PIGB      | RPE     |
| LINC01288 | PNLIPRP1 | PPIP5K1   | RPL37A  |
|           | PNLIPRP2 | AQR       | SAG     |
|           | PPP1R3C  | SECISBP2L | CCL20   |
|           | HTRA1    | ARHGAP11A | SLC4A3  |
|           | PSD      | LCMT2     | SLC11A1 |
|           | PTEN     | SLC12A6   | SP100   |
|           | PTPRE    | BCL2L10   | SPP2    |
|           | ALDH18A1 | RASGRP1   | TNP1    |
|           | RBP4     | SERF2     | TNS1    |
|           | RGR      | GNB5      | TUBA4A  |
|           | RGS10    | ARPP19    | VIL1    |
|           | RPL21    | SLC27A2   | WNT6    |
|           | SCD      | GPR176    | XRCC5   |
|           | SFRP5    | CHP1      | ZNF142  |
|           | FBXW4    | OIP5      | FZD5    |
|           | SLC18A2  | BAHD1     | SCG2    |
|           | SLIT1    | FAN1      | CUL3    |
|           | SNCG     | CEP152    | DGKD    |
|           | TAF5     | MAPKBP1   | STK16   |
|           | TCF7L2   | GOLGA8A   | PER2    |
|           | TECTB    | RTF1      | CDK5R2  |
|           | TIAL1    | CYFIP1    | CNOT9   |
|           | TLL2     | MGA       | LRRFIP1 |
|           | UROS     | DMXL2     | GPR55   |
|           | WNT8B    | VPS39     | TRIP12  |
|           | XPNPEP1  | FAM189A1  | ECEL1   |
|           | SHOC2    | AP4E1     | EIF4E2  |
|           | ADAM12   | CCNDBP1   | TTLL4   |
|           | UTF1     | EID1      | HDAC4   |
|           | LIPF     | NPAP1     | FARP2   |

cytoband  
genes in wide peak

| 8p12 | 10q24.32 | 15q21.1      | 2q36.3   |
|------|----------|--------------|----------|
|      | EIF3A    | HYPK         | FARSB    |
|      | GBF1     | TMEM87A      | ABCB6    |
|      | LDB1     | RPAP1        | ARPC2    |
|      | BTRC     | DKFZP434L187 | ARL4C    |
|      | CH25H    | PYGO1        | RAMP1    |
|      | PKD2L1   | BLOC1S6      | SPEG     |
|      | BTAF1    | GREM1        | LANCL1   |
|      | PAPSS2   | RPUSD2       | NMUR1    |
|      | INA      | TUBGCP4      | STK25    |
|      | PDLIM1   | SCG3         | COPS8    |
|      | SMC3     | TMOD3        | CAPN10   |
|      | NEURL1   | TMOD2        | SP140    |
|      | BUB3     | EHD4         | IKZF2    |
|      | LGI1     | DUOX2        | PASK     |
|      | NOLC1    | MYEF2        | ATG4B    |
|      | GSTO1    | NDUFAF1      | OBSL1    |
|      | BAG3     | RSL24D1      | DNPEP    |
|      | MINPP1   | NUSAP1       | SH3BP4   |
|      | KIF20B   | EMC4         | KCNE4    |
|      | SH3PXD2A | SPTBN5       | NGEF     |
|      | FAM53B   | CTDSPL2      | SNORD82  |
|      | SLK      | KLF13        | PNKD     |
|      | ZNF518A  | DUOX1        | SNED1    |
|      | DCLRE1A  | MAGEL2       | GIGYF2   |
|      | FRAT1    | DLL4         | TRAF3IP1 |
|      | ACTR1A   | INO80        | ABCA12   |
|      | SMNDC1   | ZNF280D      | CNPPD1   |
|      | NPM3     | TRPM7        | STK36    |
|      | GLRX3    | PPP1R14D     | CPS1-IT1 |
|      | RPP30    | MTMR10       | GMPPA    |
|      | DPYSL4   | ZNF770       | SMARCAL1 |
|      | TACC2    | FLJ10038     | ANO7     |



cytoband  
genes in wide peak

| 8p12 | 10q24.32  | 15q21.1  | 2q36.3  |
|------|-----------|----------|---------|
|      | SORBS1    | HAUS2    | PRLH    |
|      | ERLIN1    | RMDN3    | THAP4   |
|      | LBX1      | DNAJC17  | ANKMY1  |
|      | NRG3      | MNS1     | SCLY    |
|      | MGEA5     | NOP10    | ASB1    |
|      | TUBGCP2   | MYO5C    | CAB39   |
|      | PRDX3     | NSMCE3   | PRKAG3  |
|      | ADIRF     | FAM214A  | UGT1A10 |
|      | VAX1      | EMC7     | UGT1A8  |
|      | ATE1      | PAK6     | UGT1A7  |
|      | LDB3      | DTWD1    | UGT1A6  |
|      | SEC23IP   | KNL1     | UGT1A5  |
|      | RAB11FIP2 | AVEN     | UGT1A9  |
|      | CPEB3     | ATP10A   | UGT1A4  |
|      | INPP5F    | GJD2     | UGT1A1  |
|      | NT5C2     | STARD9   | UGT1A3  |
|      | PDCD11    | VPS18    | FEV     |
|      | SORCS3    | SQRDL    | PID1    |
|      | WAPL      | ZNF106   | ATG16L1 |
|      | PPRC1     | RFX7     | ANKZF1  |
|      | FAM175B   | SPATA5L1 | USP40   |
|      | RRP12     | CHAC1    | HJURP   |
|      | TBC1D12   | KATNBL1  | HES6    |
|      | DNMBP     | ATP8B4   | ASIC4   |
|      | FRAT2     | WDR76    | DOCK10  |
|      | IFIT5     | TMEM62   | MREG    |
|      | DPCD      | SEMA6D   | PECR    |
|      | SEC31B    | SPG11    | C2orf83 |
|      | ATRNL1    | ELL3     | MFF     |
|      | EDRF1     | NIPA2    | ACKR3   |
|      | LRIT1     | C15orf48 | RNPEPL1 |
|      | TCTN3     | C15orf41 |         |

04-mar

cytoband  
genes in wide peak

| 8p12 | 10q24.32 | 15q21.1      | 2q36.3  |
|------|----------|--------------|---------|
|      | C10orf12 | SPPL2A       | WDFY1   |
|      | ANKRD2   | ZFYVE19      | NYAP2   |
|      | CNNM1    | CGNL1        | USP37   |
|      | MYOF     | FRMD5        | CTDSP1  |
|      | ANKRD1   | DISP2        | GAL3ST2 |
|      | GHITM    | CHRFAM7A     | TMBIM1  |
|      | PDCD4    | ULK4P3       | RAB17   |
|      | VENTX    | ULK4P1       | RNF25   |
|      | R3HCC1L  | ARHGAP11B    | COPS7B  |
|      | POLL     | DPH6         | MRPL44  |
|      | BLNK     | C15orf57     | TRPM8   |
|      | KCNIP2   | KNSTRN       | ATG9A   |
|      | CUZD1    | BMF          | MLPH    |
|      | CALY     | SHF          | FAM134A |
|      | EXOSC1   | DUOXA1       | GLB1L   |
|      | CALHM2   | SNORD107     | SPAG16  |
|      | CUTC     | CHST14       | CHPF    |
|      | PLCE1    | CASC4        | IQCA1   |
|      | CHST15   | TUBGCP5      | NHEJ1   |
|      | SUFU     | TGM7         | FAM124B |
|      | ACSL5    | CATSPER2     | TM4SF20 |
|      | PANK1    | LEO1         | C2orf54 |
|      | CCSER2   | NIPA1        | TUBA4B  |
|      | EXOC6    | PLA2G4E      | ARMC9   |
|      | FAM35A   | TRIM69       | EFHD1   |
|      | CCNJ     | PWAR1        | SPHKAP  |
|      |          | 05-mar TERB2 | WNT10A  |
|      | ZRANB1   | LOC145783    | SLC19A3 |
|      | CFAP46   | C15orf65     | ILKAP   |
|      | NSMCE4A  | LOC145845    | ITM2C   |
|      | CNNM2    | TMCO5A       | RHBDD1  |
|      | WBP1L    | ZSCAN29      | ING5    |

cytoband  
genes in wide peak

| 8p12 | 10q24.32 | 15q21.1   | 2q36.3    |
|------|----------|-----------|-----------|
|      | CCDC186  | TTBK2     | PLCD4     |
|      | CRTAC1   | CDAN1     | MGC16025  |
|      | CEP55    | STRC      | TMEM169   |
|      | CWF19L1  | DYX1C1    | DNER      |
|      | RNLS     | CSNK1A1P1 | B3GNT7    |
|      | PI4K2A   | OTUD7A    | SP140L    |
|      | HIF1AN   | SPRED1    | LOC93463  |
|      | WDR11    | PGBD4     | STK11IP   |
|      | SLF2     | ADAL      | MOGAT1    |
|      | DHX32    | EXD1      | AGAP1     |
|      | PPP2R2D  | FSIP1     | TWIST2    |
|      | TDRD1    | RHOV      | DIS3L2    |
|      | BCCIP    | FAM227B   | NEU4      |
|      | C10orf2  | UBR1      | AP1S3     |
|      | TM9SF3   | PATL2     | SGPP2     |
|      | ENTPD7   | LPCAT4    | SPATA3    |
|      | AS3MT    | PLA2G4F   | TMEM198   |
|      | STAMBPL1 | LRRC57    | ZFAND2B   |
|      | GPAM     | LYSMD2    | FBXO36    |
|      | SHTN1    | NUTM1     | MTERF4    |
|      | FAM160B1 | WDR72     | UBE2F     |
|      | SEMA4G   | HMGN2P46  | OTOS      |
|      | PLEKHA1  | SLC24A5   | COPS9     |
|      | AVPI1    | PRTG      | OR6B3     |
|      | HPSE2    | LINC00926 | LOC150935 |
|      | FAM204A  | LOC283683 | PKI55     |
|      | LHPP     | GOLGA6L2  | KANSL1L   |
|      | MMS19    | OR4N4     | LINC01107 |
|      | NOC3L    | LOC283710 | LOC151174 |
|      | IKZF5    | FAM98B    | ERFE      |
|      | ZDHHC6   | PLA2G4D   | METTL21A  |
|      | CUEDC2   | HERC2P3   | CCNYL1    |

cytoband  
genes in wide peak

| 8p12 | 10q24.32 | 15q21.1     | 2q36.3     |
|------|----------|-------------|------------|
|      | FBXL15   | GOLGA6L1    | CCDC140    |
|      | C10orf76 | GOLGA8G     | SLC23A3    |
|      | HPS6     | GOLGA8IP    | LINC00608  |
|      | MMRN2    | SNORD108    | GPBAR1     |
|      | MFSD13A  | SNORD109A   | SLC16A14   |
|      | MCMBP    | SNORD115-1  | LOC151475  |
|      | C10orf95 | WHAMMP3     | LINC00471  |
|      | PLEKHS1  | GLDN        | LOC151484  |
|      | PDZD7    | FMN1        | MSL3P1     |
|      | OBFC1    | SNORD64     | DAW1       |
|      | C10orf88 | PWAR4       | C2orf57    |
|      | UBTD1    | PWARSN      | PIKFYVE    |
|      | CFAP43   | LINC01193   | TIGD1      |
|      | LRRC27   | MRPL42P5    | LOC200772  |
|      | TNKS2    | USP50       | CFAP65     |
|      | TRIM8    | TEX9        | C2orf72    |
|      | KAZALD1  | IGHV1OR15-1 | RTP5       |
|      | SFXN3    | C15orf52    | LOC285095  |
|      | SLC25A28 | TNFAIP8L3   | UNC80      |
|      | ELOVL3   | GOLGA8EP    | RUFY4      |
|      | MARVELD1 | OR4M2       | DUSP28     |
|      | PCGF6    | OR4N3P      | MROH2A     |
|      | LOXL4    | HERC2P10    | ESPNL      |
|      | ZDHHC16  | SHC4        | ECEL1P2    |
|      | PCGF5    | CTXN2       | SPATA3-AS1 |
|      | ADGRA1   | HERC2P2     | CATIP      |
|      | LZTS2    | C15orf53    | RBM44      |
|      | LCOR     | C15orf54    | AQP12A     |
|      | NKX6-2   | DUOXA2      | KLHL30     |
|      | MRPL43   | MIR211      | PLEKHM3    |
|      | AFAP1L2  | NF1P2       | C2orf80    |
|      | PYROXD2  | GOLGA6L22   | RESP18     |

cytoband  
genes in wide peak

| 8p12 | 10q24.32 | 15q21.1     | 2q36.3       |
|------|----------|-------------|--------------|
|      | USMG5    | HERC2P9     | C2orf82      |
|      | ATAD1    | WHAMMP2     | OR6B2        |
|      | ARHGAP19 | GOLGA8B     | ASB18        |
|      | KNDC1    | EIF2AK4     | FLJ43879     |
|      | ITPRIP   | CATSPER2P1  | VWC2L        |
|      | OLMALINC | UNC13C      | MIR149       |
|      | MTG1     | LINC00929   | MIR153-1     |
|      | CDHR1    | CKMT1A      | MIR26B       |
|      | BBIP1    | SERINC4     | DNAJB3       |
|      | FANK1    | C15orf62    | LOC440934    |
|      | OPALIN   | GOLGA8N     | MIR375       |
|      | SYCE1    | C15orf56    | LOC643387    |
|      | OPN4     | PHGR1       | LINC00607    |
|      | HOGA1    | EIF3J-AS1   | LOC646736    |
|      | SORCS1   | CHEK2P2     | PRSS56       |
|      | PRAP1    | LOC646214   | AQP12B       |
|      | ZNF511   | CXADRP2     | SNORA75      |
|      | C10orf90 | PDCD6IPP2   | LOC654841    |
|      | BTBD16   | IGHV1OR15-3 | SCARNA6      |
|      | FAM24A   | REREP3      | SCARNA5      |
|      | PSTK     | GOLGA8S     | MIR562       |
|      | PIK3AP1  | GOLGA8J     | D2HGDH       |
|      | MORN4    | GOLGA8T     | LOC728323    |
|      | ZFYVE27  | GOLGA8K     | DIRC3        |
|      | MMP21    | GOLGA8M     | LOC100129175 |
|      | FRA10AC1 | MIR626      | PP14571      |
|      | ANKRD22  | MIR627      | LOC100130451 |
|      | SFXN2    | MIR628      | LOC100286922 |
|      | PDZD8    | ANP32AP1    | MIR1471      |
|      | BORCS7   | GOLGA6L6    | MIR1302-4    |
|      | NUDT9P1  | LOC727924   | MIR1244-1    |
|      | AGAP11   | GOLGA8O     | MIR548F2     |

cytoband  
genes in wide peak

| 8p12 | 10q24.32  | 15q21.1     | 2q36.3       |
|------|-----------|-------------|--------------|
|      | GSTO2     | GOLGA6L7P   | BOK-AS1      |
|      | SFR1      | GOLGA8H     | MIR1244-3    |
|      | CALHM3    | PIN4P1      | MIR1244-2    |
|      | CTAGE7P   | OIP5-AS1    | MIR3133      |
|      | CLRN3     | GOLGA8CP    | MIR3131      |
|      | PNLIPRP3  | PWRN1       | MIR4268      |
|      | SFXN4     | PWRN2       | MIR3132      |
|      | CPXM2     | SNORD116-1  | MIR4269      |
|      | ACSM6     | SNORD116-2  | AGAP1-IT1    |
|      | LIPJ      | SNORD116-3  | LOC100507443 |
|      | CFL1P1    | SNORD116-4  | IDH1-AS1     |
|      | TRUB1     | SNORD116-5  | UBE2F-SCLY   |
|      | VTI1A     | SNORD116-8  | MIR4439      |
|      | HECTD2    | SNORD116-10 | MIR4776-1    |
|      | FGFBP3    | SNORD116-11 | MIR4777      |
|      | C10orf82  | SNORD116-12 | MIR2467      |
|      | CACUL1    | SNORD116-13 | MIR4775      |
|      | NKX2-3    | SNORD116-14 | MIR4438      |
|      | SLC35G1   | SNORD116-15 | MIR4440      |
|      | CFAP58    | SNORD116-16 | MIR4786      |
|      | C10orf91  | SNORD116-17 | MIR4441      |
|      | PWWP2B    | SNORD116-18 | MIR5001      |
|      | LINC00858 | SNORD116-20 | MIR5702      |
|      | EMX2OS    | SNORD116-21 | MIR5703      |
|      | PLPP4     | SNORD116-22 | VWC2L-IT1    |
|      | PAOX      | SNORD116-23 | LOC100996693 |
|      | FAM24B    | SNORD116-24 | CAPN10-AS1   |
|      | EBF3      | SNORD116-25 | LINC01237    |
|      | CALHM1    | SNORD115-2  | LOC101927960 |
|      | CASC2     | SNORD116-26 | LOC101928020 |
|      | TCERG1L   | SNORD116-27 | LOC101928103 |
|      | HSPA12A   | SNORD115-3  | LOC101928111 |

cytoband  
genes in wide peak

| 8p12 | 10q24.32  | 15q21.1     | 2q36.3       |
|------|-----------|-------------|--------------|
|      | PIPSL     | SNORD115-4  | LINC01280    |
|      | FUOM      | SNORD115-5  | LOC101928327 |
|      | JAKMIP3   | SNORD115-6  | CATIP-AS1    |
|      | STK32C    | SNORD115-7  | LINC01494    |
|      | BLOC1S2   | SNORD115-8  | LOC101928881 |
|      | RBM20     | SNORD115-10 | MIR6513      |
|      | PDCD4-AS1 | SNORD115-11 | MIR6809      |
|      | FLJ37201  | SNORD115-12 | MIR6811      |
|      | LOC283038 | SNORD115-13 | MIR6810      |
|      | WDR11-AS1 | SNORD115-14 | LOC102723927 |
|      | FFAR4     | SNORD115-15 | LOC102724714 |
|      | KCNK18    | SNORD115-16 | LANCL1-AS1   |
|      | LIPM      | SNORD115-17 | LOC102724849 |
|      | CYP26C1   | SNORD115-18 | LOC102725079 |
|      | VWA2      | SNORD115-20 | MIR9500      |
|      | NANOS1    | SNORD115-21 | CATIP-AS2    |
|      | LRIT2     | SNORD115-22 | LINC01614    |
|      | HMX3      | SNORD115-23 | LOC105373876 |
|      | NHLRC2    | SNORD115-25 | DIRC3-AS1    |
|      | CCDC172   | SNORD115-26 | LOC105373878 |
|      | DMBT1P1   | SNORD115-29 | LINC01173    |
|      | C10orf99  | SNORD115-30 |              |
|      | SLC16A12  | SNORD115-31 |              |
|      | CC2D2B    | SNORD115-32 |              |
|      | ENO4      | SNORD115-33 |              |
|      | ARMS2     | SNORD115-34 |              |
|      | TEX36     | SNORD115-35 |              |
|      | LINC00959 | SNORD115-36 |              |
|      | GUCY2GP   | SNORD115-37 |              |
|      | NKX1-2    | SNORD115-38 |              |
|      | LBX1-AS1  | SNORD115-39 |              |
|      | C10orf120 | SNORD115-41 |              |

cytoband  
genes in wide peak

| 8p12 | 10q24.32  | 15q21.1      | 2q36.3 |
|------|-----------|--------------|--------|
|      | LOC399815 | SNORD115-44  |        |
|      | METTL10   | SNORD116-28  |        |
|      | FLJ37035  | SNORD116-29  |        |
|      | FOXI2     | SNORD115-48  |        |
|      | LINC01164 | SNORD115-24  |        |
|      | LINC01168 | SNORD115-27  |        |
|      | SPRNP1    | SNORD115-28  |        |
|      | GOLGA7B   | SNORD115-45  |        |
|      | LINC01561 | SNORD115-47  |        |
|      | FAM45A    | MIR147B      |        |
|      | MIR107    | LOC100128714 |        |
|      | C10orf62  | GABPB1-AS1   |        |
|      | LINC00863 | LOC100129973 |        |
|      | IFIT1B    | LOC100130111 |        |
|      | FRG2B     | SRP14-AS1    |        |
|      | MIR346    | ANKRD63      |        |
|      | SPRN      | LOC100131315 |        |
|      | MIR146B   | HERC2P7      |        |
|      | MIR202    | GOLGA8F      |        |
|      | NPS       | DCAF13P3     |        |
|      | SCART1    | GOLGA8DP     |        |
|      | SNORA19   | JMJD7        |        |
|      | HOST2     | PLA2G4B      |        |
|      | FAM196A   | POTEB2       |        |
|      | FAM25A    | WHAMMP1      |        |
|      | LIPK      | LOC100288637 |        |
|      | LIPN      | LOC100289656 |        |
|      | LINC00865 | MIR1233-1    |        |
|      | RPL13AP6  | MIR1266      |        |
|      | SNORA12   | MIR1268A     |        |
|      | MIR607    | MIR1282      |        |
|      | MIR608    | NDUFAF4P1    |        |



cytoband  
genes in wide peak

| 8p12 | 10q24.32   | 15q21.1        | 2q36.3 |
|------|------------|----------------|--------|
|      | MIR609     | LOC100419583   |        |
|      | NUTM2A     | LOC100422556   |        |
|      | NUTM2D     | MIR3118-3      |        |
|      | NUTM2A-AS1 | MIR1233-2      |        |
|      | LINC00864  | MIR3118-4      |        |
|      | ENTPD1-AS1 | MIR3118-2      |        |
|      | RPL13AP5   | MIR4310        |        |
|      | RPEL1      | MIR3942        |        |
|      | TLX1NB     | INAFM2         |        |
|      | MIR936     | RAD51-AS1      |        |
|      | C10orf131  | DPH6-AS1       |        |
|      | PLCE1-AS1  | SERF2-C15ORF63 |        |
|      | ADGRA1-AS1 | DYX1C1-CCPG1   |        |
|      | ATE1-AS1   | MIR4509-1      |        |
|      | ACTA2-AS1  | MIR4509-2      |        |
|      | KLLN       | MIR4508        |        |
|      | TEX36-AS1  | MIR4510        |        |
|      | HECTD2-AS1 | MIR4716        |        |
|      | DNMBP-AS1  | MIR4713        |        |
|      | DUX4       | MIR4712        |        |
|      | KCNIP2-AS1 | MIR4715        |        |
|      | MIR1287    | TMCO5B         |        |
|      | MIR1307    | MIR5701-2      |        |
|      | MIR2110    | MIR5701-1      |        |
|      | FAS-AS1    | SNORD116-30    |        |
|      | MIR548E    | SNORD115-46    |        |
|      | MIR378C    | LOC100996255   |        |
|      | MIR4297    | POTEB          |        |
|      | MIR3157    | GOLGA8R        |        |
|      | MIR3158-1  | LOC101927079   |        |
|      | MIR4295    | LOC101928042   |        |
|      | MIR3158-2  | LOC101928134   |        |

cytoband  
genes in wide peak

| 8p12 | 10q24.32       | 15q21.1      | 2q36.3 |
|------|----------------|--------------|--------|
|      | MIR4296        | LOC101928174 |        |
|      | MIR3941        | LOC101928227 |        |
|      | MIR3663        | EHD4-AS1     |        |
|      | MIR3944        | PLA2G4E-AS1  |        |
|      | SLIT1-AS1      | LOC101928414 |        |
|      | LINC00866      | LINC01491    |        |
|      | RPARP-AS1      | PIGBOS1      |        |
|      | SH3PXD2A-AS1   | LINC01413    |        |
|      | CFAP58-AS1     | PWRN3        |        |
|      | SORCS3-AS1     | GABRG3-AS1   |        |
|      | ADD3-AS1       | MIR7973-2    |        |
|      | LINC00867      | MIR7973-1    |        |
|      | GRID1-AS1      | MIR8063      |        |
|      | TNKS2-AS1      | POTEB3       |        |
|      | MARK2P9        | LOC102725022 |        |
|      | BORCS7-ASMT    | PWRN4        |        |
|      | ARHGAP19-SLIT1 | LOC105370757 |        |
|      | FAM24B-CUZD1   | LOC105370792 |        |
|      | MIR4680        | LOC105370802 |        |
|      | MIR4679-1      | LOC105370829 |        |
|      | MIR4483        | LOC105370941 |        |
|      | MIR4679-2      | LOC105370943 |        |
|      | MIR4678        | BUB1B-PAK6   |        |
|      | MIR4682        |              |        |
|      | MIR4482        |              |        |
|      | MIR4484        |              |        |
|      | MIR4681        |              |        |
|      | MIR4685        |              |        |
|      | LINC00502      |              |        |
|      | LINC00601      |              |        |
|      | FANK1-AS1      |              |        |
|      | SLC16A12-AS1   |              |        |

cytoband  
genes in wide peak

8p12

10q24.32

15q21.1

2q36.3

---

LINC01375  
LOC101926942  
PLCE1-AS2  
LOC101927278  
LINC01475  
LINC01163  
LINC01514  
LOC101927419  
LOC101927472  
TCERG1L-AS1  
LOC101927523  
LOC101927549  
LINC01166  
MIR202HG  
LOC101927692  
MIR3663HG  
FAM53B-AS1  
EDRF1-AS1  
NRG3-AS1  
LINC01519  
LOC101929646  
LOC101929662  
LINC01520  
MIR6507  
MIR6715B  
MIR6715A  
LOC102723665  
NEURL1-AS1  
LOC102724589  
LOC103344931  
LINC01435  
LINC01167

cytoband  
genes in wide peak

8p12

10q24.32

15q21.1

2q36.3

LOC105378397

XLOC\_008559

LOC105378430

LOC105378470

AS-PTPRE

SNORA87
