# Supplementary material for: Homologous Recombination Repair Mechanisms in Serous Endometrial Cancer
Source: MDPI journal article supplement (doi:10.3390/cancers13020254), 2021-01-12

**Supplementary Figure S1.** Heatmap of cases and genes with genetic loss (A), LOH (B), and homozygous deletions (C), respectively in HRD-associated genes. Bar plots show summarized data on each axis. Genes defined as “core HRD genes” are shown in bold.

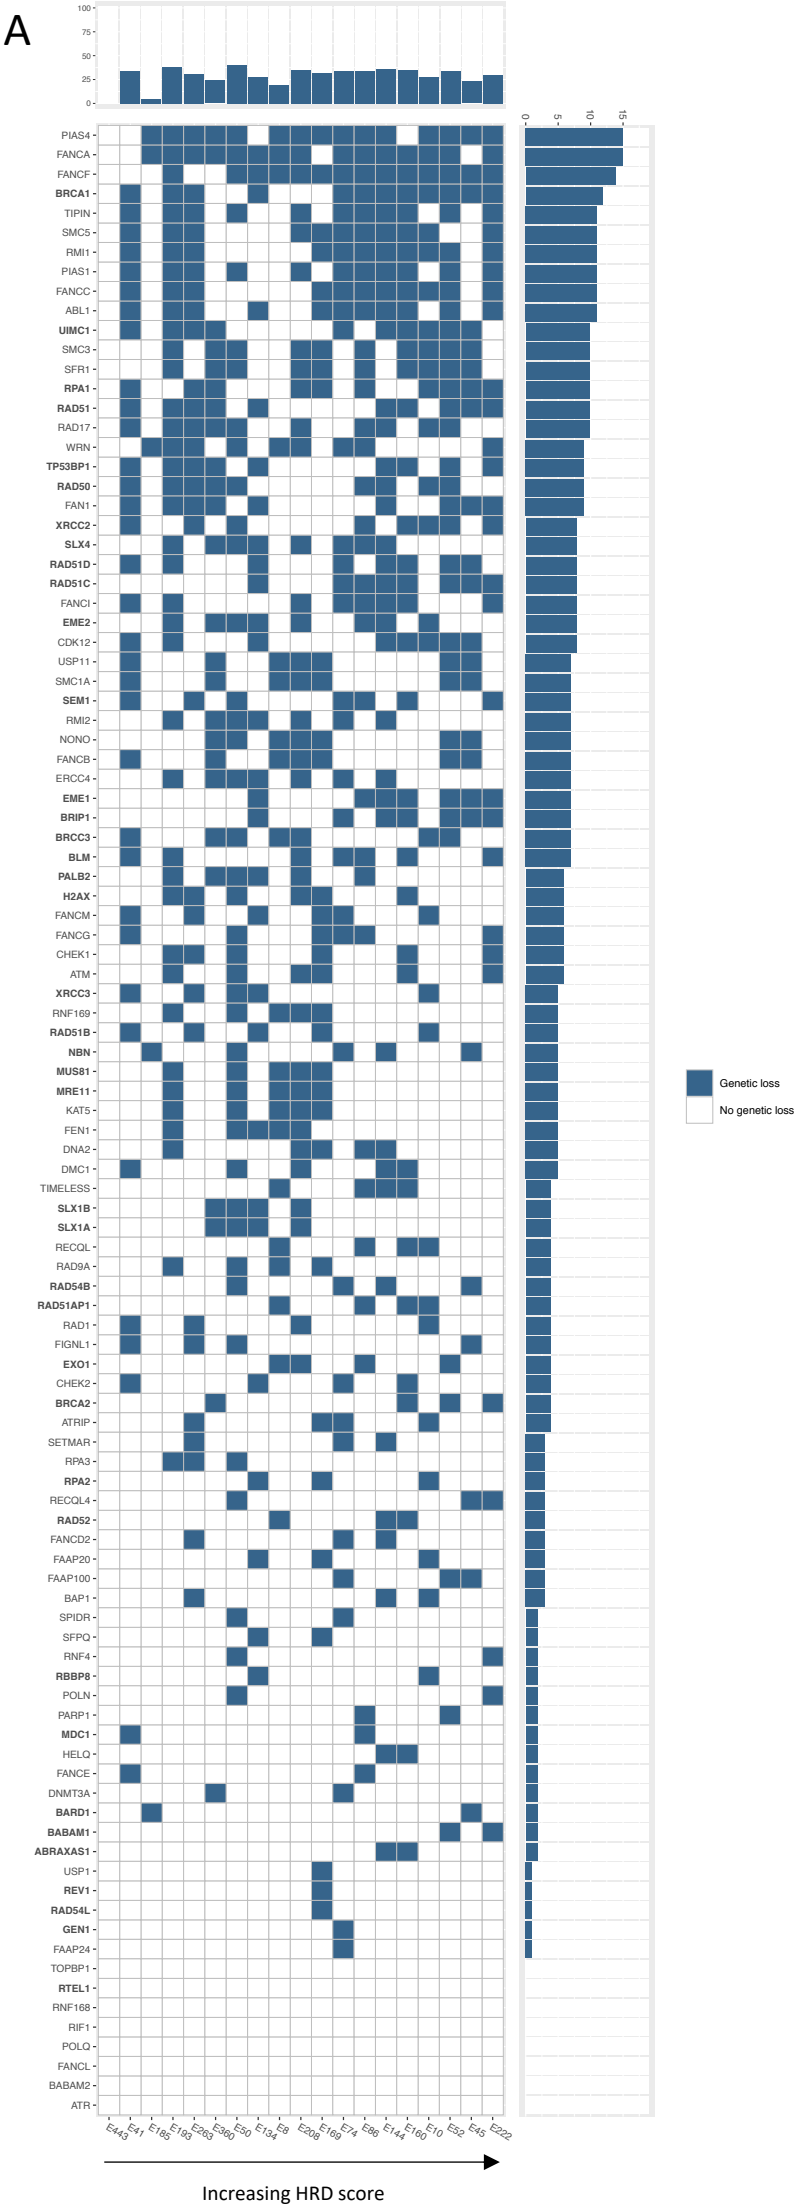

B

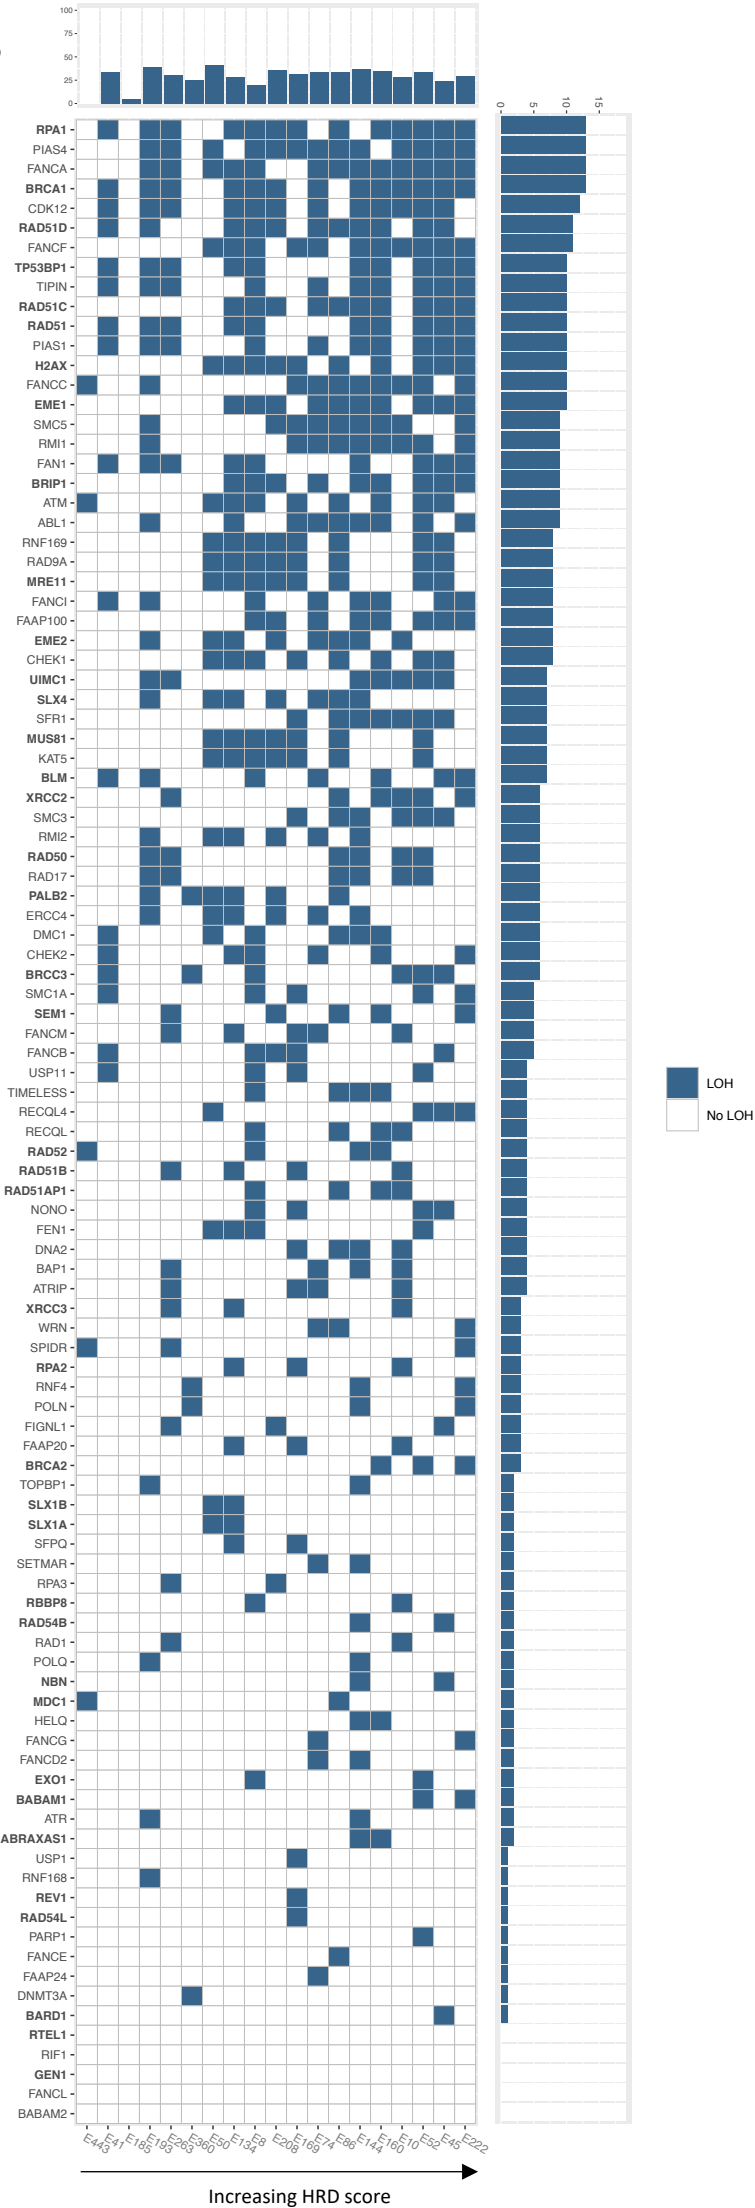

C

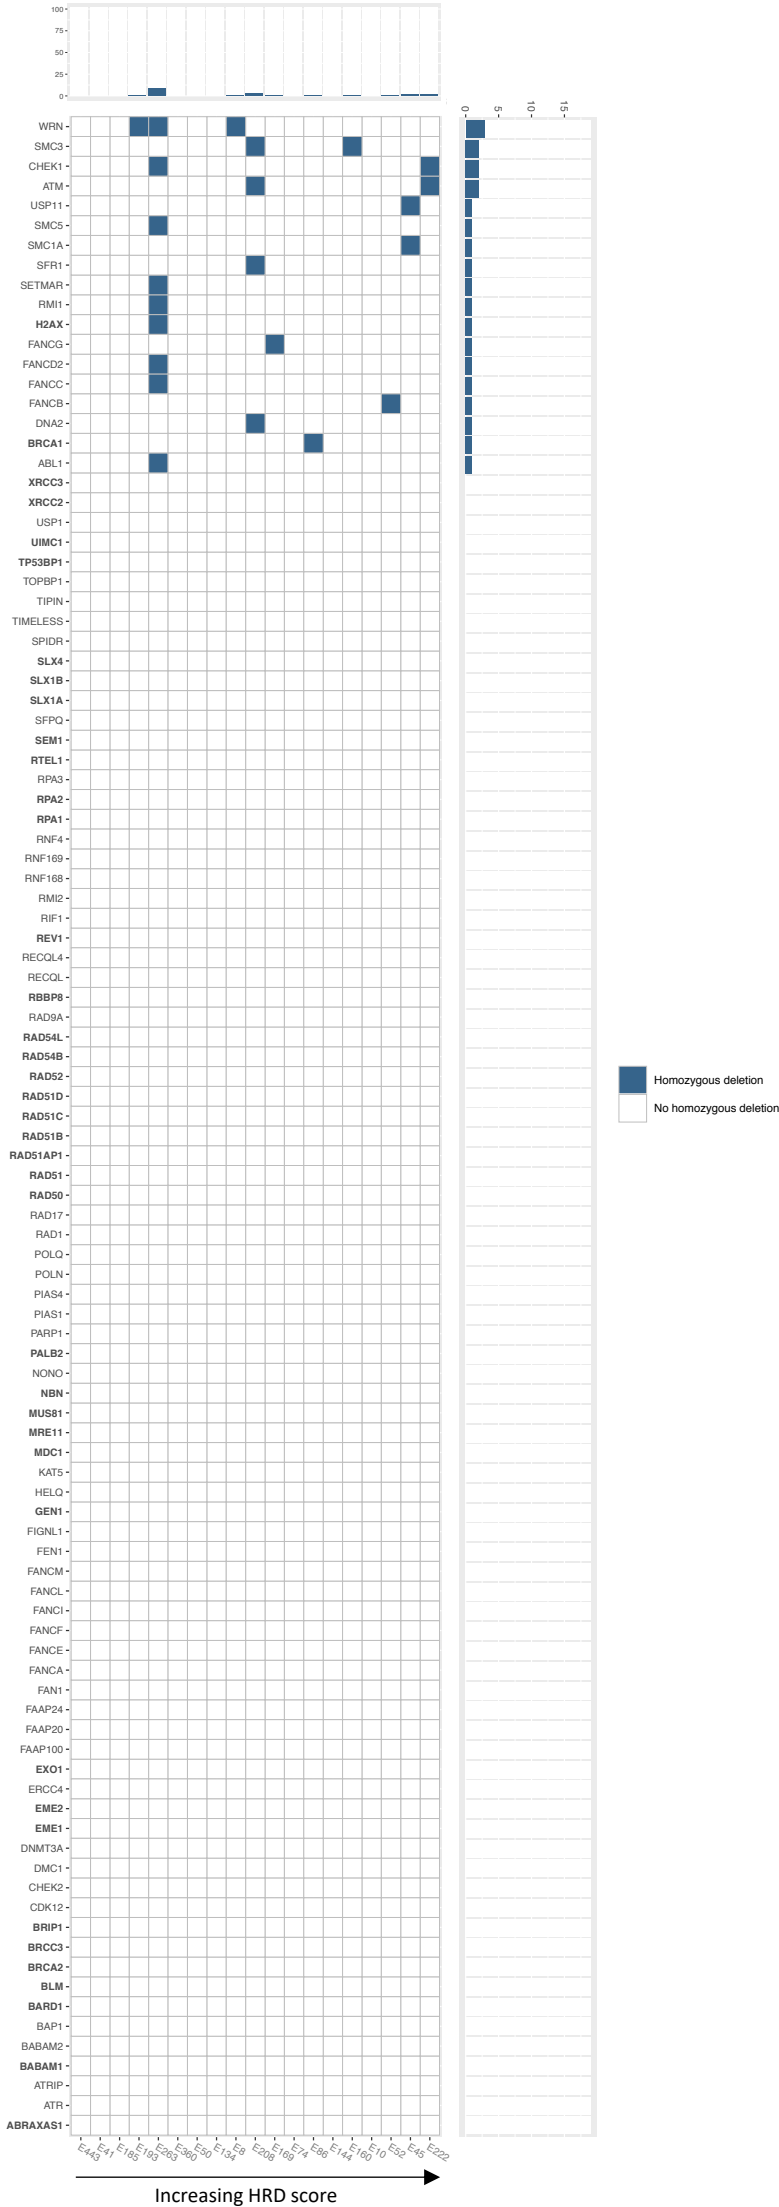

Supplement: s1 [file s1]
