# Supplementary material for: Homologous Recombination Repair Mechanisms in Serous Endometrial Cancer
Source: MDPI journal article supplement (doi:10.3390/cancers13020254), 2021-01-12
Supplement: s1 [file s1]

Supplementary Table S5 Genes included in significant GISTIC amplification peaks

| cytoband             | 8q24.21                  | 10q22.3                 | 6p21.1                 | 3q26.32                  |
|----------------------|--------------------------|-------------------------|------------------------|--------------------------|
| q value              | 4,12E-05                 | 0,0074492               | 0,016048               | 0,026013                 |
| residual q value     | 4,12E-05                 | 0,0074492               | 0,016048               | 0,026013                 |
| wide peak boundaries | chr8:127725454-128643982 | chr10:72587024-85038622 | chr6:43727939-44345684 | chr3:169257608-198295559 |
| genes in wide peak   | MYC                      | ADK                     | SLC29A1                | ACTL6A                   |
|                      | PVT1                     | ANXA7                   | HSP90AB1               | AHSG                     |
|                      | TMEM75                   | ANXA11                  | NFKBIE                 | APOD                     |
|                      | CASC11                   | CAMK2G                  | VEGFA                  | BCL6                     |
|                      | MIR1205                  | GLUD1P3                 | CAPN11                 | BDH1                     |
|                      | MIR1206                  | KCNMA1                  | TMEM63B                | AP2M1                    |
|                      | MIR1207                  | MAT1A                   | AARS2                  | CLCN2                    |
|                      | MIR1204                  | P4HA1                   | MRPL14                 | CPN2                     |
|                      | MIR1208                  | PLAU                    | TCTE1                  | CRYGS                    |
|                      | LINC00824                | PPP3CB                  | SPATS1                 | DGKG                     |
|                      |                          | RGR                     | C6orf223               | DLG1                     |
|                      |                          | RPS24                   | SLC35B2                | DVL3                     |
|                      |                          | SFTPD                   | TMEM151B               | ECT2                     |
|                      |                          | VCL                     | LINC01512              | EHHADH                   |
|                      |                          | VDAC2                   | MIR4647                | EIF4A2                   |
|                      |                          | NDST2                   | LOC101929705           | EIF4G1                   |
|                      |                          | MBL1P                   | LOC101929726           | EPHB3                    |
|                      |                          | DLG5                    |                        | ETV5                     |
|                      |                          | SEC24C                  |                        | MECOM                    |
|                      |                          | PPIF                    |                        | FGF12                    |
|                      |                          | MICU1                   |                        | GHSR                     |
|                      |                          | NRG3                    |                        | GP5                      |
|                      |                          | POLR3A                  |                        | HRG                      |
|                      |                          | ECD                     |                        | HES1                     |
|                      |                          | ZSWIM8                  |                        | IL1RAP                   |
|                      |                          | DNAJC9                  |                        | KNG1                     |
|                      |                          | KAT6B                   |                        | LPP                      |

cytoband  
genes in wide peak

| 8q24.21 | 10q22.3     | 6p21.1 | 3q26.32 |
|---------|-------------|--------|---------|
|         | NUDT13      |        | MELTF   |
|         | LRIT1       |        | MUC4    |
|         | AP3M1       |        | NDUFB5  |
|         | GHITM       |        | OPA1    |
|         | MRPS16      |        | CLDN11  |
|         | DUSP13      |        | PAK2    |
|         | CCSER2      |        | PCYT1A  |
|         | ZMIZ1       |        | PIK3CA  |
|         | MYOZ1       |        | PLD1    |
|         | SYNPO2L     |        | POLR2H  |
|         | TMEM254     |        | PPP1R2  |
|         | TSPAN14     |        | PRKCI   |
|         | C10orf11    |        | MASP1   |
|         | FAM213A     |        | PSMD2   |
|         | DYDC2       |        | RFC4    |
|         | PLA2G12B    |        | SNORA63 |
|         | ZNF503      |        | RPL35A  |
|         | MCU         |        | TRA2B   |
|         | CDHR1       |        | ST6GAL1 |
|         | CHCHD1      |        | SKIL    |
|         | MSS51       |        | SLC2A2  |
|         | CFAP70      |        | SOX2    |
|         | COMTD1      |        | SST     |
|         | SAMD8       |        | TERC    |
|         | DYDC1       |        | TFRC    |
|         | EIF5AL1     |        | THPO    |
|         | USP54       |        | SEC62   |
|         | FUT11       |        | FXR1    |
|         | OIT3        |        | TP63    |
|         | LINC00858   |        | CHRD    |
|         | TMEM254-AS1 |        | TNFSF10 |
|         | PLAC9       |        | EIF2B5  |

cytoband  
genes in wide peak

| 8q24.21 | 10q22.3      | 6p21.1 | 3q26.32 |
|---------|--------------|--------|---------|
|         | ZCCHC24      |        | USP13   |
|         | ZNF503-AS1   |        | CLDN1   |
|         | ZMIZ1-AS1    |        | MAP3K13 |
|         | FAM149B1     |        | ADIPOQ  |
|         | DUPD1        |        | RUBCN   |
|         | LRIT2        |        | ECE2    |
|         | SH2D4B       |        | ABCC5   |
|         | C10orf99     |        | TNK2    |
|         | C10orf55     |        | ALG3    |
|         | LINC00595    |        | KCNMB2  |
|         | DNAJC9-AS1   |        | IGF2BP2 |
|         | LINC00857    |        | CLDN16  |
|         | LOC642361    |        | NLGN1   |
|         | HOST2        |        | NCBP2   |
|         | BEND3P3      |        | TNIK    |
|         | SFTPA1       |        | MCF2L2  |
|         | MIR606       |        | ATP11B  |
|         | AGAP5        |        | VPS8    |
|         | BMS1P4       |        | ACAP2   |
|         | SFTPA2       |        | UBXN7   |
|         | NUTM2B       |        | RNU6-1  |
|         | LOC729815    |        | GPR160  |
|         | DLG5-AS1     |        | FETUB   |
|         | LOC100130698 |        | LAMP3   |
|         | ZNF503-AS2   |        | KCNMB3  |
|         | LINC00856    |        | ZNF639  |
|         | BMS1P21      |        | PEX5L   |
|         | ZSWIM8-AS1   |        | DNAJB11 |
|         | MIR4676      |        | DCUN1D1 |
|         | NUTM2B-AS1   |        | KLHL24  |
|         | PPP3CB-AS1   |        | PIGX    |
|         | LOC101929165 |        | TBCCD1  |

cytoband  
genes in wide peak

8q24.21

10q22.3

6p21.1

3q26.32

LOC101929234  
KCNMA1-AS3  
KCNMA1-AS2  
KCNMA1-AS1  
LOC101929574  
NRG3-AS1  
LOC102723439  
LOC102723703  
LOC105378367  
LOC105378385  
LOC105378397

P3H2  
ABCF3  
LSG1  
PARL  
MFN1  
YEATS2  
MYNN  
EIF5A2  
MCCC1  
HRASLS  
MRPL47  
NCEH1  
SLC7A14  
SEN2  
GNB4  
RTP4  
MAGEF1  
ZMAT3  
FNDC3B  
ATP13A3  
TBL1XR1  
LRRC31  
MAP6D1  
PHC3  
PIGZ  
SPATA16  
B3GNT5  
IQCG  
ATP13A4  
FYTTD1  
ACTRT3  
MGC2889

cytoband  
genes in wide peak

8q24.21

10q22.3

6p21.1

3q26.32

---

LRCH3  
CEP19  
LMLN  
KLHL6  
VWA5B2  
TMEM41A  
TMEM44  
CAMK2N2  
TM4SF19  
RPL39L  
DNAJC19  
FAM131A  
ZDHHC19  
LRRC15  
FAM43A  
TMEM207  
RTP1  
TTC14  
LRRC34  
MB21D2  
XXYLT1  
CCDC50  
PYDC2  
NCBP2-AS2  
RNF168  
HTR3C  
LIPH  
HTR3D  
RPL22L1  
SLC51A  
FBXO45  
MUC20

cytoband  
genes in wide peak

8q24.21

10q22.3

6p21.1

3q26.32

---

SENPA  
LOC220729  
LOC253573  
NAALADL2  
TCTEX1D2  
SMCO1  
SDHAP1  
UTS2B  
HTR3E  
C3orf70  
TPRG1  
LOC285389  
CCDC39  
EHHADH-AS1  
LPP-AS2  
LRRIQ4  
SAMD7  
NMRAL1P1  
RTP2  
OSTN  
ATP13A5  
SOX2-OT  
WDR53  
ANKRD18DP  
NRROS  
TMEM212  
FLJ46066  
FLJ42393  
LINC00884  
LINC00885  
MIR28  
LINC00969

cytoband  
genes in wide peak

8q24.21

10q22.3

6p21.1

3q26.32

---

SNORD2  
SNORA4  
IGF2BP2-AS1  
GMNC  
LOC647323  
SNORA81  
SNORD66  
MIR569  
MIR570  
SDHAP2  
FAM157A  
MIR922  
MIR944  
DPPA2P3  
LOC100128164  
LINC00887  
LOC100131635  
SNAR-I  
MIR1224  
MIR1248  
MIR3137  
LINC01208  
LINC00578  
LOC100505609  
LINC00888  
LOC100505920  
MFI2-AS1  
DLG1-AS1  
TMEM44-AS1  
LOC100507391  
TM4SF19-TCTEX1D2  
MIR4448

cytoband  
genes in wide peak

8q24.21

10q22.3

6p21.1

3q26.32

---

MIR4797  
MIR4789  
LINC00501  
MIR5588  
MIR548AQ  
NAALADL2-AS3  
LPP-AS1  
OPA1-AS1  
LMLN-AS1  
ABCC5-AS1  
FGF12-AS1  
FGF12-AS3  
NLGN1-AS1  
KLHL6-AS1  
TPRG1-AS2  
UBXN7-AS1  
TPRG1-AS1  
EIF2B5-AS1  
ADIPOQ-AS1  
TM4SF19-AS1  
ATP13A5-AS1  
TMEM212-AS1  
NAALADL2-AS2  
NAALADL2-AS1  
LINC01014  
XXYLT1-AS1  
LINC01206  
XXYLT1-AS2  
LOC101928583  
LINC01209  
LOC101928739  
PEX5L-AS2



cytoband  
genes in wide peak

8q24.21

10q22.3

6p21.1

3q26.32

---

LOC101928882

LOC101928992

LOC101929106

LOC101929130

P3H2-AS1

ATP13A4-AS1

LOC101929337

LOC101929697

LINC01063

RNU6-7

MIR6828

MIR7977

MIR6829

KCCAT211

LOC102724604

LOC102724699

LINC0002

RNU6-2

KCNMB2-AS1

LOC105374205

LOC105374244

LOC105374250

LOC105374266

LOC105374297

HTR3E-AS1

OSTN-AS1

# Genes included in significant GISTIC amplification peaks

| cytoband             | 17q12                   | 18q11.2                 | 14q11.2          | 19q12                   |
|----------------------|-------------------------|-------------------------|------------------|-------------------------|
| q value              | 0,12943                 | 0,13216                 | 0,13973          | 0,13973                 |
| residual q value     | 0,12943                 | 0,13216                 | 0,13973          | 0,13973                 |
| wide peak boundaries | chr17:37666372-39694523 | chr18:13982664-30683883 | chr14:1-24266417 | chr19:29382842-30440290 |
| genes in wide peak   | CACNB1                  | AQP4                    | hsa-mir-1201     | CCNE1                   |
|                      | ERBB2                   | CDH2                    | ANG              | URI1                    |
|                      | LASP1                   | GATA6                   | APEX1            | ZNF536                  |
|                      | MLLT6                   | LAMA3                   | BCL2L2           | POP4                    |
|                      | NEUROD2                 | NPC1                    | CEBPE            | PLEKHF1                 |
|                      | PNMT                    | RBBP8                   | DAD1             | C19orf12                |
|                      | MED1                    | ROCK1                   | HNRNPC           | LOC284395               |
|                      | PSMB3                   | SNRPD1                  | MMP14            | VSTM2B                  |
|                      | RPL19                   | SS18                    | MYH6             |                         |
|                      | HNF1B                   | TAF4B                   | MYH7             |                         |
|                      | PCGF2                   | RIOK3                   | NEDD8            |                         |
|                      | PIP4K2B                 | ZNF521                  | PNP              |                         |
|                      | TCAP                    | CABYR                   | NRL              |                         |
|                      | RPL23                   | C18orf8                 | OXA1L            |                         |
|                      | STARD3                  | IMPACT                  | PCK2             |                         |
|                      | SOCS7                   | MIB1                    | PSMB5            |                         |
|                      | CDK12                   | HRH4                    | PSME1            |                         |
|                      | CWC25                   | CTAGE1                  | PSME2            |                         |
|                      | PLXDC1                  | GREB1L                  | RABGGTA          |                         |
|                      | ARHGAP23                | CHST9                   | RNASE1           |                         |
|                      | SRCIN1                  | TMEM241                 | RNASE2           |                         |
|                      | PPP1R1B                 | CABLES1                 | RNASE3           |                         |
|                      | TBC1D3F                 | ESCO1                   | RNASE4           |                         |
|                      | MRPL45                  | OSBPL1A                 | RNASE6           |                         |
|                      | FBXL20                  | TTC39C                  | SALL2            |                         |
|                      | PGAP3                   | PSMA8                   | TEP1             |                         |
|                      | YWHAEP7                 | AQP4-AS1                | TGM1             |                         |

cytoband  
genes in wide peak

| 17q12        | 18q11.2      | 14q11.2   | 19q12 |
|--------------|--------------|-----------|-------|
| CISD3        | ANKRD29      | PABPN1    |       |
| LRRC37A11P   | ZNF519       | AP1G2     |       |
| STAC2        | ABHD3        | SLC7A7    |       |
| C17orf98     | CYP4F35P     | CPNE6     |       |
| ARL5C        | KCTD1        | TOX4      |       |
| TBC1D3C      | ANKRD30B     | REC8      |       |
| LOC440434    | POTEC        | PARP2     |       |
| GPR179       | LINC01443    | DHRS2     |       |
| FBXO47       | MIR1-2       | EFS       |       |
| SNORA21      | MIR133A1     | IRF9      |       |
| TBC1D3       | CXADRP3      | PRMT5     |       |
| TBC1D3H      | ANKRD20A5P   | TM9SF1    |       |
| LOC100131347 | LOC644669    | EDDM3A    |       |
| C17orf96     | PCAT18       | DHRS4     |       |
| LINC00672    | LOC729950    | SUPT16H   |       |
| MIR4726      | GATA6-AS1    | ACIN1     |       |
| MIR4734      | MIR302F      | SLC7A8    |       |
| MIR4727      | MIR320C1     | NGDN      |       |
| TBC1D3G      | MIR320C2     | LRP10     |       |
| TBC1D3K      | MIR3156-2    | TINF2     |       |
| TBC1D3L      | LINC01543    | OR10G3    |       |
| LOC101060389 | MIR4741      | OR10G2    |       |
| MIR6779      | LOC101927571 | OR4E2     |       |
| TBC1D3E      | LINC01444    | OR4E1     |       |
| TBC1D3I      | MIR8057      | CHMP4A    |       |
| LOC105371766 | MIR133A1HG   | SLC39A2   |       |
|              | TTC39C-AS1   | EMC9      |       |
|              | LOC105372028 | ZNF219    |       |
|              | LOC105372038 | GMPR2     |       |
|              |              | SLC22A17  |       |
|              |              | HAUS4     |       |
|              |              | C14orf119 |       |

cytoband  
genes in wide peak

17q12

18q11.2

14q11.2

19q12

---

RNF31  
RBM23  
DHRS4-AS1  
OSGEP  
ARHGEF40  
METTL3  
RPGRIP1  
NDRG2  
HOMEZ  
CHD8  
CCNB1IP1  
C14orf93  
ABHD4  
EDDM3B  
CDH24  
METTL17  
IL25  
THTPA  
OR4K5  
OR11H2  
OR4K1  
IPO4  
DCAF11  
OR4K15  
JPH4  
RNASE7  
RAB2B  
AJUBA  
ZFH2  
RPPH1  
CARMIL3  
PPP1R3E

cytoband  
genes in wide peak

17q12

18q11.2

14q11.2

19q12

---

TMEM55B  
TTC5  
CMTM5  
RNASE11  
TPPP2  
RNASE8  
MRPL52  
PSMB11  
OR4K14  
OR4L1  
OR11H6  
KLHL33  
MDP1  
FITM1  
REM2  
LOC254028  
LINC00641  
TSSK4  
DHRS4L2  
SNORD8  
RNASE10  
OR6S1  
OR4N2  
OR4K2  
OR4K13  
OR4K17  
OR4N5  
OR11G2  
OR11H4  
RNASE9  
OR5AU1  
POTEG

cytoband  
genes in wide peak

17q12

18q11.2

14q11.2

19q12

---

MIR208A  
OR11H12  
RNASE13  
OR4Q3  
OR4M1  
RNASE12  
DUXAP10  
POTEM  
LOC642426  
LINC01296  
ECRP  
TMEM253  
SNORD9  
DHRS4L1  
SNORD126  
MIR208B  
PRMT5-AS1  
RNF212B  
LOC100508046  
NEDD8-MDP1  
BCL2L2-PABPN1  
MIR4707  
POTEH-AS1  
BMS1P17  
LOC101926933  
LOC101929572  
LOC101929718  
MIR6717  
MIR7703  
LOC102724814  
MHRT  
BMS1P22

Genes included in significant GISTIC amplification peaks

|                      |                         |
|----------------------|-------------------------|
| cytoband             | 11q13.1                 |
| q value              | 0,22918                 |
| residual q value     | 0,22918                 |
| wide peak boundaries | chr11:64043444-64121820 |
| genes in wide peak   | FLRT1<br>MACROD1        |
